# Supplementary material for: Secondary nucleation of α-Synuclein drives Mitochondria dysfunctions and Lewy body formation in Parkinson’s Disease
Source: bioRxiv preprint, doi:10.1101/2025.09.17.676873, version 1 (2025-09-19)
Supplement: Mass spec data [file 676873_file03.xlsx]

## Sheet: Legend
Supplemental Table X: MaxQuant outputs for LC-MS/MS analysis of α-synuclein in vitro phosphorylation assays +/- PLK3. A protein FDR of 0.01 and a peptide FDR of 0.01 were used for identification level cut-offs. Class I phosphorylation sites were filtered to a localisation probability of >0.75 and a score difference of >5.
Sample/File name	Sample description	Digestion	LC-MS/MS acquisition settings
alpha-Syn_PLK3-01	In vitro phosphorylation assay with alpha-Syn and PLK3	Trypsin	Default as described in the methods
alpha-Syn_PLK3-02	In vitro phosphorylation assay with alpha-Syn and PLK3	Trypsin	MS1 scan range 375-5000, Charge states 1-6
alpha-Syn_PLK3-03	In vitro phosphorylation assay with alpha-Syn and PLK3	Trypsin/Proalanase	MS1 scan range 375-5000, Charge states 1-6
alpha-Syn-01	In vitro phosphorylation assay with alpha-Syn (control)	Trypsin	Default as described in the methods
alpha-Syn-02	In vitro phosphorylation assay with alpha-Syn (control)	Trypsin	MS1 scan range 375-5000, Charge states 1-6
alpha-Syn-03	In vitro phosphorylation assay with alpha-Syn (control)	Trypsin/Proalanase	MS1 scan range 375-5000, Charge states 1-6

## Sheet: proteinGroups
Protein IDs	Majority protein IDs	Peptide counts (all)	Peptide counts (razor+unique)	Peptide counts (unique)	Fasta headers	Protein names	Gene names	Number of proteins	Peptides	Razor + unique peptides	Unique peptides	Peptides alpha-Syn_PLK3-01	Peptides alpha-Syn_PLK3-02	Peptides alpha-Syn_PLK3-03	Peptides alpha-Syn-01	Peptides alpha-Syn-02	Peptides alpha-Syn-03	Razor + unique peptides alpha-Syn_PLK3-01	Razor + unique peptides alpha-Syn_PLK3-02	Razor + unique peptides alpha-Syn_PLK3-03	Razor + unique peptides alpha-Syn-01	Razor + unique peptides alpha-Syn-02	Razor + unique peptides alpha-Syn-03	Unique peptides alpha-Syn_PLK3-01	Unique peptides alpha-Syn_PLK3-02	Unique peptides alpha-Syn_PLK3-03	Unique peptides alpha-Syn-01	Unique peptides alpha-Syn-02	Unique peptides alpha-Syn-03	Sequence coverage [%]	Unique + razor sequence coverage [%]	Unique sequence coverage [%]	Mol. weight [kDa]	Sequence length	Sequence lengths	Q-value	Score	Sequence coverage alpha-Syn_PLK3-01 [%]	Sequence coverage alpha-Syn_PLK3-02 [%]	Sequence coverage alpha-Syn_PLK3-03 [%]	Sequence coverage alpha-Syn-01 [%]	Sequence coverage alpha-Syn-02 [%]	Sequence coverage alpha-Syn-03 [%]	Intensity	Intensity alpha-Syn_PLK3-01	Intensity alpha-Syn_PLK3-02	Intensity alpha-Syn_PLK3-03	Intensity alpha-Syn-01	Intensity alpha-Syn-02
sp|P37840|SYUA_HUMAN	sp|P37840|SYUA_HUMAN	50	50	50	sp|P37840|SYUA_HUMAN Alpha-synuclein OS=Homo sapiens OX=9606 GN=SNCA PE=1 SV=1	Alpha-synuclein	SNCA	1	50	50	50	24	24	23	26	24	25	24	24	23	26	24	25	24	24	23	26	24	25	99.3	99.3	99.3	14.46	140	140	0	323.31	72.1	72.1	77.1	72.1	72.1	77.1	818660000000	116990000000	225920000000	66196000000	175230000000	163380000000
sp|Q7DJ60|EHAG_ECO57	sp|Q7DJ60|EHAG_ECO57	1	1	1	sp|Q7DJ60|EHAG_ECO57 Autotransporter adhesin EhaG OS=Escherichia coli O157:H7 OX=83334 GN=ehaG PE=2 SV=1	Autotransporter adhesin EhaG	ehaG	1	1	1	1	0	1	1	1	1	1	0	1	1	1	1	1	0	1	1	1	1	1	0.5	0.5	0.5	160.15	1588	1588	0	10.236	0	0.5	0.5	0.5	0.5	0.5	3521700000	0	793930000	774780000	3176800	879360000
sp|P66828|SODM_ECO57	sp|P66828|SODM_ECO57	13	13	13	sp|P66828|SODM_ECO57 Superoxide dismutase [Mn] OS=Escherichia coli O157:H7 OX=83334 GN=sodA PE=3 SV=2	Superoxide dismutase [Mn]	sodA	1	13	13	13	10	10	5	10	9	5	10	10	5	10	9	5	10	10	5	10	9	5	49	49	49	23.079	206	206	0	323.31	45.6	45.6	18.4	45.6	43.2	21.8	3376800000	525450000	583080000	257070000	643950000	929740000
tr|Q8X943|Q8X943_ECO57	tr|Q8X943|Q8X943_ECO57	21	21	21	tr|Q8X943|Q8X943_ECO57 Galactose-1-phosphate uridylyltransferase OS=Escherichia coli O157:H7 OX=83334 GN=galT PE=3 SV=1	Galactose-1-phosphate uridylyltransferase	galT	1	21	21	21	11	15	5	14	15	9	11	15	5	14	15	9	11	15	5	14	15	9	52.3	52.3	52.3	39.653	348	348	0	323.31	34.8	49.4	13.5	35.3	41.1	21	2384300000	296910000	612400000	230930000	358480000	524230000
sp|P0AB72|ALF_ECO57	sp|P0AB72|ALF_ECO57	20	20	20	sp|P0AB72|ALF_ECO57 Fructose-bisphosphate aldolase class 2 OS=Escherichia coli O157:H7 OX=83334 GN=fbaA PE=3 SV=2	Fructose-bisphosphate aldolase class 2	fbaA	1	20	20	20	13	12	4	13	12	7	13	12	4	13	12	7	13	12	4	13	12	7	53.8	53.8	53.8	39.147	359	359	0	323.31	44.8	40.7	13.1	44.3	35.9	23.7	2341500000	317230000	576910000	21938000	411360000	703080000
tr|Q8XDU6|Q8XDU6_ECO57	tr|Q8XDU6|Q8XDU6_ECO57	16	16	16	tr|Q8XDU6|Q8XDU6_ECO57 Putative glucose-6-phosphate 1-epimerase OS=Escherichia coli O157:H7 OX=83334 GN=yeaD PE=3 SV=2	Putative glucose-6-phosphate 1-epimerase	yeaD	1	16	16	16	8	8	6	9	8	7	8	8	6	9	8	7	8	8	6	9	8	7	42.9	42.9	42.9	32.772	294	294	0	323.31	33	33	19	33	33	19.7	1738500000	290490000	414640000	104400000	307470000	434310000
tr|Q8X828|Q8X828_ECO57	tr|Q8X828|Q8X828_ECO57	8	8	8	tr|Q8X828|Q8X828_ECO57 Kinase inhibitor OS=Escherichia coli O157:H7 OX=83334 GN=ybhB PE=4 SV=1	Kinase inhibitor	ybhB	1	8	8	8	4	4	2	5	4	4	4	4	2	5	4	4	4	4	2	5	4	4	49.4	49.4	49.4	17.071	158	158	0	162.83	39.9	39.9	15.8	49.4	39.9	25.9	1581600000	241110000	382990000	88878000	360490000	396390000
sp|P0ACE8|HINT_ECO57	sp|P0ACE8|HINT_ECO57	8	8	8	sp|P0ACE8|HINT_ECO57 Purine nucleoside phosphoramidase OS=Escherichia coli O157:H7 OX=83334 GN=hinT PE=3 SV=1	Purine nucleoside phosphoramidase	hinT	1	8	8	8	4	4	5	5	5	5	4	4	5	5	5	5	4	4	5	5	5	5	59.7	59.7	59.7	13.241	119	119	0	323.31	31.9	32.8	50.4	38.7	38.7	50.4	1482200000	174490000	228610000	266540000	199090000	311070000
tr|Q8XE67|Q8XE67_ECO57	tr|Q8XE67|Q8XE67_ECO57	1	1	1	tr|Q8XE67|Q8XE67_ECO57 Autotransporter outer membrane protein OS=Escherichia coli O157:H7 OX=83334 GN=yejO PE=4 SV=2	Autotransporter outer membrane protein	yejO	1	1	1	1	0	0	0	1	0	1	0	0	0	1	0	1	0	0	0	1	0	1	1.3	1.3	1.3	91.115	863	863	0	6.3529	0	0	0	1.3	0	1.3	663320000	0	0	0	615410000	0
sp|Q9H4B4|PLK3_HUMAN	sp|Q9H4B4|PLK3_HUMAN	16	16	16	sp|Q9H4B4|PLK3_HUMAN Serine/threonine-protein kinase PLK3 OS=Homo sapiens OX=9606 GN=PLK3 PE=1 SV=2	Serine/threonine-protein kinase PLK3	PLK3	1	16	16	16	11	13	3	0	0	0	11	13	3	0	0	0	11	13	3	0	0	0	19.3	19.3	19.3	71.628	646	646	0	323.31	17.8	17	2.8	0	0	0	567070000	205070000	325480000	36516000	0	0
sp|P0AE10|AHPC_ECO57	sp|P0AE10|AHPC_ECO57	11	11	11	sp|P0AE10|AHPC_ECO57 Alkyl hydroperoxide reductase C OS=Escherichia coli O157:H7 OX=83334 GN=ahpC PE=3 SV=2	Alkyl hydroperoxide reductase C	ahpC	1	11	11	11	7	7	5	7	9	4	7	7	5	7	9	4	7	7	5	7	9	4	67.4	67.4	67.4	20.761	187	187	0	295.71	47.1	46	33.2	49.7	59.4	29.4	508610000	73190000	126140000	37987000	60978000	160220000
tr|Q8X6S5|Q8X6S5_ECO57	tr|Q8X6S5|Q8X6S5_ECO57	1	1	1	tr|Q8X6S5|Q8X6S5_ECO57 Glutaredoxin 1 OS=Escherichia coli O157:H7 OX=83334 GN=grxA PE=4 SV=1	Glutaredoxin 1	grxA	1	1	1	1	0	1	0	1	1	0	0	1	0	1	1	0	0	1	0	1	1	0	8.2	8.2	8.2	9.6948	85	85	0	10.332	0	8.2	0	8.2	8.2	0	507900000	0	288870000	0	9589800	209430000
sp|Q8XAW7|RBSA1_ECO57	sp|Q8XAW7|RBSA1_ECO57	1	1	1	sp|Q8XAW7|RBSA1_ECO57 Ribose import ATP-binding protein RbsA 1 OS=Escherichia coli O157:H7 OX=83334 GN=rbsA1 PE=3 SV=1	Ribose import ATP-binding protein RbsA 1	rbsA1	1	1	1	1	1	1	1	1	1	1	1	1	1	1	1	1	1	1	1	1	1	1	2.2	2.2	2.2	55.015	501	501	0	6.3737	2.2	2.2	2.2	2.2	2.2	2.2	273490000	29111000	0	86709000	0	0
tr|Q8XD35|Q8XD35_ECO57	tr|Q8XD35|Q8XD35_ECO57	3	3	3	tr|Q8XD35|Q8XD35_ECO57 UDP-sugar hydrolase OS=Escherichia coli O157:H7 OX=83334 GN=ushA PE=3 SV=1	UDP-sugar hydrolase	ushA	1	3	3	3	0	1	0	0	0	2	0	1	0	0	0	2	0	1	0	0	0	2	6.5	6.5	6.5	60.73	550	550	0	23.053	0	2.9	0	0	0	3.6	265760000	0	0	0	0	0
sp|P0AAQ4|YAJD_ECO57	sp|P0AAQ4|YAJD_ECO57	6	6	6	sp|P0AAQ4|YAJD_ECO57 Putative HNH nuclease YajD OS=Escherichia coli O157:H7 OX=83334 GN=yajD PE=3 SV=1	Putative HNH nuclease YajD	yajD	1	6	6	6	4	3	2	3	4	2	4	3	2	3	4	2	4	3	2	3	4	2	42.6	42.6	42.6	13.364	115	115	0	323.31	35.7	28.7	20	28.7	35.7	20	225820000	38687000	41449000	31340000	30590000	52163000
sp|Q8XE41|OMPC_ECO57	sp|Q8XE41|OMPC_ECO57	6	6	6	sp|Q8XE41|OMPC_ECO57 Outer membrane porin C OS=Escherichia coli O157:H7 OX=83334 GN=ompC PE=3 SV=1	Outer membrane porin C	ompC	1	6	6	6	4	1	0	6	1	1	4	1	0	6	1	1	4	1	0	6	1	1	28.9	28.9	28.9	40.508	367	367	0	323.31	22.9	9	0	28.9	9	9	186940000	56678000	6499900	0	83376000	36490000
sp|P0A6N3|EFTU_ECO57	sp|P0A6N3|EFTU_ECO57	12	12	12	sp|P0A6N3|EFTU_ECO57 Elongation factor Tu OS=Escherichia coli O157:H7 OX=83334 GN=tufA PE=3 SV=2	Elongation factor Tu	tufA	1	12	12	12	10	0	0	12	2	0	10	0	0	12	2	0	10	0	0	12	2	0	40.9	40.9	40.9	43.313	394	394	0	323.31	35.3	0	0	40.9	6.1	0	183790000	48428000	0	0	125420000	9942000
sp|P60625|RL24_ECO57	sp|P60625|RL24_ECO57	3	3	3	sp|P60625|RL24_ECO57 50S ribosomal protein L24 OS=Escherichia coli O157:H7 OX=83334 GN=rplX PE=3 SV=2	50S ribosomal protein L24	rplX	1	3	3	3	1	0	0	3	1	0	1	0	0	3	1	0	1	0	0	3	1	0	29.8	29.8	29.8	11.316	104	104	0	323.31	17.3	0	0	29.8	17.3	0	180320000	62161000	0	0	92868000	25295000
sp|P68067|GRCA_ECO57	sp|P68067|GRCA_ECO57	7	7	7	sp|P68067|GRCA_ECO57 Autonomous glycyl radical cofactor OS=Escherichia coli O157:H7 OX=83334 GN=grcA PE=3 SV=1	Autonomous glycyl radical cofactor	grcA	1	7	7	7	5	5	1	2	5	1	5	5	1	2	5	1	5	5	1	2	5	1	68.5	68.5	68.5	14.284	127	127	0	224.06	49.6	51.2	10.2	18.1	49.6	10.2	168510000	23371000	51558000	19394000	9638900	44630000
sp|P0AGD5|SODF_ECO57	sp|P0AGD5|SODF_ECO57	7	7	7	sp|P0AGD5|SODF_ECO57 Superoxide dismutase [Fe] OS=Escherichia coli O157:H7 OX=83334 GN=sodB PE=3 SV=2	Superoxide dismutase [Fe]	sodB	1	7	7	7	3	3	0	3	5	1	3	3	0	3	5	1	3	3	0	3	5	1	49.2	49.2	49.2	21.265	193	193	0	142.86	22.3	31.6	0	22.3	31.6	6.7	147020000	30454000	36817000	0	38577000	34640000
sp|Q8XDE9|GPMI_ECO57	sp|Q8XDE9|GPMI_ECO57	12	12	12	sp|Q8XDE9|GPMI_ECO57 2,3-bisphosphoglycerate-independent phosphoglycerate mutase OS=Escherichia coli O157:H7 OX=83334 GN=gpmI PE=3 SV=1	2,3-bisphosphoglycerate-independent phosphoglycerate mutase	gpmI	1	12	12	12	6	5	3	5	7	3	6	5	3	5	7	3	6	5	3	5	7	3	29.8	29.8	29.8	56.109	514	514	0	323.31	15.4	14.2	6.6	15	20	6	139790000	26188000	25512000	11596000	20214000	45409000
sp|P0AG61|RS14_ECO57	sp|P0AG61|RS14_ECO57	1	1	1	sp|P0AG61|RS14_ECO57 30S ribosomal protein S14 OS=Escherichia coli O157:H7 OX=83334 GN=rpsN PE=3 SV=2	30S ribosomal protein S14	rpsN	1	1	1	1	1	1	0	1	1	0	1	1	0	1	1	0	1	1	0	1	1	0	18.8	18.8	18.8	11.58	101	101	0	23.729	18.8	18.8	0	18.8	18.8	0	131810000	35790000	14151000	0	55943000	25930000
sp|Q8X9M3|PNP_ECO57	sp|Q8X9M3|PNP_ECO57	2	2	2	sp|Q8X9M3|PNP_ECO57 Polyribonucleotide nucleotidyltransferase OS=Escherichia coli O157:H7 OX=83334 GN=pnp PE=3 SV=2	Polyribonucleotide nucleotidyltransferase	pnp	1	2	2	2	1	1	1	1	1	1	1	1	1	1	1	1	1	1	1	1	1	1	4.4	4.4	4.4	77.101	711	711	0	26.235	2.7	1.7	1.7	1.7	1.7	1.7	116390000	1248900	34372000	13131000	4478300	36846000
sp|Q8XD32|GCST_ECO57	sp|Q8XD32|GCST_ECO57	6	6	6	sp|Q8XD32|GCST_ECO57 Aminomethyltransferase OS=Escherichia coli O157:H7 OX=83334 GN=gcvT PE=3 SV=1	Aminomethyltransferase	gcvT	1	6	6	6	4	4	2	5	5	1	4	4	2	5	5	1	4	4	2	5	5	1	21.7	21.7	21.7	40.189	364	364	0	211.49	17	19.8	5.5	21.7	21.7	3	112260000	14656000	30926000	10049000	14849000	34193000
sp|P0A911|OMPA_ECO57	sp|P0A911|OMPA_ECO57	6	6	6	sp|P0A911|OMPA_ECO57 Outer membrane protein A OS=Escherichia coli O157:H7 OX=83334 GN=ompA PE=3 SV=1	Outer membrane protein A	ompA	1	6	6	6	1	1	0	6	1	0	1	1	0	6	1	0	1	1	0	6	1	0	28.6	28.6	28.6	37.2	346	346	0	323.31	7.2	7.2	0	28.6	7.2	0	111160000	25868000	10294000	0	48175000	26826000
sp|P0A6Q1|ENO_ECO57	sp|P0A6Q1|ENO_ECO57	6	6	6	sp|P0A6Q1|ENO_ECO57 Enolase OS=Escherichia coli O157:H7 OX=83334 GN=eno PE=3 SV=2	Enolase	eno	1	6	6	6	4	2	0	5	1	0	4	2	0	5	1	0	4	2	0	5	1	0	20.4	20.4	20.4	45.654	432	432	0	139.74	14.8	10.4	0	20.4	6.9	0	110050000	29847000	11216000	0	55320000	13669000
sp|P0A9B4|G3P1_ECO57	sp|P0A9B4|G3P1_ECO57	2	2	2	sp|P0A9B4|G3P1_ECO57 Glyceraldehyde-3-phosphate dehydrogenase A OS=Escherichia coli O157:H7 OX=83334 GN=gapA PE=3 SV=2	Glyceraldehyde-3-phosphate dehydrogenase A	gapA	1	2	2	2	2	1	0	1	1	0	2	1	0	1	1	0	2	1	0	1	1	0	12.4	12.4	12.4	35.532	331	331	0	164.43	12.4	8.2	0	8.2	8.2	0	106480000	46484000	14403000	0	30784000	14804000
tr|A0A0H3JK53|A0A0H3JK53_ECO57	tr|A0A0H3JK53|A0A0H3JK53_ECO57	1	1	1	tr|A0A0H3JK53|A0A0H3JK53_ECO57 Maltose regulon periplasmic protein OS=Escherichia coli O157:H7 OX=83334 GN=malM PE=4 SV=1	Maltose regulon periplasmic protein	malM	1	1	1	1	1	1	0	1	0	0	1	1	0	1	0	0	1	1	0	1	0	0	4.9	4.9	4.9	31.943	306	306	0	6.309	4.9	4.9	0	4.9	0	0	104720000	19223000	58816000	0	26682000	0
sp|Q8X621|YDHQ_ECO57	sp|Q8X621|YDHQ_ECO57	1	1	1	sp|Q8X621|YDHQ_ECO57 Uncharacterized protein YdhQ OS=Escherichia coli O157:H7 OX=83334 GN=ydhQ PE=4 SV=1	Uncharacterized protein YdhQ	ydhQ	1	1	1	1	0	0	1	0	0	0	0	0	1	0	0	0	0	0	1	0	0	0	1.9	1.9	1.9	42.891	418	418	0	11.092	0	0	1.9	0	0	0	103910000	0	0	103910000	0	0
sp|Q8XD03|PGK_ECO57	sp|Q8XD03|PGK_ECO57	2	2	2	sp|Q8XD03|PGK_ECO57 Phosphoglycerate kinase OS=Escherichia coli O157:H7 OX=83334 GN=pgk PE=3 SV=3	Phosphoglycerate kinase	pgk	1	2	2	2	2	1	0	2	1	0	2	1	0	2	1	0	2	1	0	2	1	0	10.1	10.1	10.1	41.13	387	387	0	48.564	10.1	6.5	0	10.1	6.5	0	99753000	22235000	10287000	0	47167000	20065000
tr|Q8X9T1|Q8X9T1_ECO57	tr|Q8X9T1|Q8X9T1_ECO57	1	1	1	tr|Q8X9T1|Q8X9T1_ECO57 Uncharacterized protein OS=Escherichia coli O157:H7 OX=83334 GN=ECs_2016 PE=4 SV=1	Uncharacterized protein	ECs_2016	1	1	1	1	1	1	0	1	1	0	1	1	0	1	1	0	1	1	0	1	1	0	11.3	11.3	11.3	16.67	141	141	0	6.4803	11.3	11.3	0	11.3	11.3	0	99138000	19137000	25465000	0	22805000	31732000
sp|P0A7T9|RS18_ECO57	sp|P0A7T9|RS18_ECO57	1	1	1	sp|P0A7T9|RS18_ECO57 30S ribosomal protein S18 OS=Escherichia coli O157:H7 OX=83334 GN=rpsR PE=3 SV=2	30S ribosomal protein S18	rpsR	1	1	1	1	1	1	0	1	1	0	1	1	0	1	1	0	1	1	0	1	1	0	24	24	24	8.9863	75	75	0	70.569	24	24	0	24	24	0	94876000	22516000	10593000	0	42070000	19696000
sp|P0AG69|RS1_ECO57	sp|P0AG69|RS1_ECO57	4	4	4	sp|P0AG69|RS1_ECO57 30S ribosomal protein S1 OS=Escherichia coli O157:H7 OX=83334 GN=rpsA PE=3 SV=1	30S ribosomal protein S1	rpsA	1	4	4	4	3	1	0	3	1	1	3	1	0	3	1	1	3	1	0	3	1	1	8.1	8.1	8.1	61.157	557	557	0	261.2	8.1	2.7	0	6.1	2.7	2.7	80557000	28224000	6919800	0	34539000	9006400
sp|P0A6A5|ACKA_ECO57	sp|P0A6A5|ACKA_ECO57	4	4	4	sp|P0A6A5|ACKA_ECO57 Acetate kinase OS=Escherichia coli O157:H7 OX=83334 GN=ackA PE=3 SV=1	Acetate kinase	ackA	1	4	4	4	4	2	0	4	2	0	4	2	0	4	2	0	4	2	0	4	2	0	17.8	17.8	17.8	43.29	400	400	0	130.91	17.8	10.8	0	17.8	10.8	0	79522000	20643000	9328100	0	27887000	21664000
sp|Q8X4B4|NQOR_ECO57	sp|Q8X4B4|NQOR_ECO57	5	5	5	sp|Q8X4B4|NQOR_ECO57 NAD(P)H dehydrogenase (quinone) OS=Escherichia coli O157:H7 OX=83334 GN=Z1423/Z1504 PE=5 SV=3	NAD(P)H dehydrogenase (quinone)	Z1423/Z1504	1	5	5	5	3	3	0	4	3	0	3	3	0	4	3	0	3	3	0	4	3	0	31.8	31.8	31.8	20.834	198	198	0	38.497	14.1	17.2	0	26.3	17.2	0	67131000	8901900	20898000	0	15883000	21447000
sp|P0A7L2|RL1_ECO57	sp|P0A7L2|RL1_ECO57	5	5	5	sp|P0A7L2|RL1_ECO57 50S ribosomal protein L1 OS=Escherichia coli O157:H7 OX=83334 GN=rplA PE=3 SV=2	50S ribosomal protein L1	rplA	1	5	5	5	2	0	0	5	1	0	2	0	0	5	1	0	2	0	0	5	1	0	32.5	32.5	32.5	24.729	234	234	0	323.31	12	0	0	32.5	6.8	0	58398000	29605000	0	0	26810000	1983300
tr|Q8XEB4|Q8XEB4_ECO57	tr|Q8XEB4|Q8XEB4_ECO57	5	5	5	tr|Q8XEB4|Q8XEB4_ECO57 Formate C-acetyltransferase OS=Escherichia coli O157:H7 OX=83334 GN=tdcE PE=3 SV=1	Formate C-acetyltransferase	tdcE	1	5	5	5	2	1	0	5	2	0	2	1	0	5	2	0	2	1	0	5	2	0	10.4	10.4	10.4	85.349	760	760	0	323.31	5.9	3.3	0	10.4	5.9	0	57066000	7761900	4594000	0	28623000	16086000
sp|P0AA06|PTHP_ECO57	sp|P0AA06|PTHP_ECO57	2	2	2	sp|P0AA06|PTHP_ECO57 Phosphocarrier protein HPr OS=Escherichia coli O157:H7 OX=83334 GN=ptsH PE=3 SV=1	Phosphocarrier protein HPr	ptsH	1	2	2	2	2	2	0	2	1	1	2	2	0	2	1	1	2	2	0	2	1	1	35.3	35.3	35.3	9.1193	85	85	0	27.242	35.3	35.3	0	35.3	27.1	27.1	52454000	15121000	8954600	0	21497000	5688700
sp|P0AAI7|FABF_ECO57	sp|P0AAI7|FABF_ECO57	1	1	1	sp|P0AAI7|FABF_ECO57 3-oxoacyl-[acyl-carrier-protein] synthase 2 OS=Escherichia coli O157:H7 OX=83334 GN=fabF PE=3 SV=2	3-oxoacyl-[acyl-carrier-protein] synthase 2	fabF	1	1	1	1	1	1	0	1	1	0	1	1	0	1	1	0	1	1	0	1	1	0	5.6	5.6	5.6	43.045	413	413	0	14.195	5.6	5.6	0	5.6	5.6	0	48724000	11117000	5450700	0	22949000	9206900
sp|P0A7W0|RS4_ECO57	sp|P0A7W0|RS4_ECO57	4	4	4	sp|P0A7W0|RS4_ECO57 30S ribosomal protein S4 OS=Escherichia coli O157:H7 OX=83334 GN=rpsD PE=3 SV=2	30S ribosomal protein S4	rpsD	1	4	4	4	0	1	1	3	2	0	0	1	1	3	2	0	0	1	1	3	2	0	21.8	21.8	21.8	23.469	206	206	0	41.88	0	8.7	6.3	21.8	17.5	0	46226000	0	9955700	3597300	18323000	14350000
tr|Q8XE44|Q8XE44_ECO57	tr|Q8XE44|Q8XE44_ECO57	1	1	1	tr|Q8XE44|Q8XE44_ECO57 Microcin J25 efflux ABC transporter permease/ATPase OS=Escherichia coli O157:H7 OX=83334 GN=yojI PE=4 SV=1	Microcin J25 efflux ABC transporter permease/ATPase	yojI	1	1	1	1	0	0	1	0	0	0	0	0	1	0	0	0	0	0	1	0	0	0	1.3	1.3	1.3	61.57	547	547	0	7.4521	0	0	1.3	0	0	0	41692000	0	0	41692000	0	0
sp|Q8XEG2|GLMS_ECO57	sp|Q8XEG2|GLMS_ECO57	6	6	6	sp|Q8XEG2|GLMS_ECO57 Glutamine--fructose-6-phosphate aminotransferase [isomerizing] OS=Escherichia coli O157:H7 OX=83334 GN=glmS PE=3 SV=3	Glutamine--fructose-6-phosphate aminotransferase [isomerizing]	glmS	1	6	6	6	4	0	0	5	1	0	4	0	0	5	1	0	4	0	0	5	1	0	15.1	15.1	15.1	66.908	609	609	0	51.753	12.6	0	0	11.8	3.3	0	41062000	15358000	0	0	15453000	10251000
sp|P0A6F7|CH60_ECO57	sp|P0A6F7|CH60_ECO57	4	4	4	sp|P0A6F7|CH60_ECO57 60 kDa chaperonin OS=Escherichia coli O157:H7 OX=83334 GN=groL PE=3 SV=2	60 kDa chaperonin	groL	1	4	4	4	3	1	0	3	1	0	3	1	0	3	1	0	3	1	0	3	1	0	15	15	15	57.328	548	548	0	91.912	9.7	3.1	0	11.7	3.1	0	34700000	11592000	0	0	17421000	5686700
sp|P0A9L1|SLYD_ECO57	sp|P0A9L1|SLYD_ECO57	4	4	4	sp|P0A9L1|SLYD_ECO57 FKBP-type peptidyl-prolyl cis-trans isomerase SlyD OS=Escherichia coli O157:H7 OX=83334 GN=slyD PE=3 SV=1	FKBP-type peptidyl-prolyl cis-trans isomerase SlyD	slyD	1	4	4	4	3	1	0	4	1	0	3	1	0	4	1	0	3	1	0	4	1	0	35.7	35.7	35.7	20.853	196	196	0	134.24	30.1	4.6	0	35.7	7.1	0	31417000	12189000	4647400	0	13041000	1540000
sp|P0A6N0|EFG_ECO57	sp|P0A6N0|EFG_ECO57	9	9	9	sp|P0A6N0|EFG_ECO57 Elongation factor G OS=Escherichia coli O157:H7 OX=83334 GN=fusA PE=3 SV=2	Elongation factor G	fusA	1	9	9	9	3	0	0	8	1	0	3	0	0	8	1	0	3	0	0	8	1	0	23	23	23	77.58	704	704	0	105.96	7.1	0	0	20.9	4.3	0	30653000	4908100	0	0	23812000	1932500
sp|P0A9Q8|ADHE_ECO57	sp|P0A9Q8|ADHE_ECO57	7	7	7	sp|P0A9Q8|ADHE_ECO57 Aldehyde-alcohol dehydrogenase OS=Escherichia coli O157:H7 OX=83334 GN=adhE PE=3 SV=2	Aldehyde-alcohol dehydrogenase	adhE	1	7	7	7	2	0	0	7	2	0	2	0	0	7	2	0	2	0	0	7	2	0	16.5	16.5	16.5	96.126	891	891	0	214.66	4.4	0	0	16.5	4.4	0	30250000	4425000	0	0	19025000	6800400
sp|P0A919|OMPX_ECO57	sp|P0A919|OMPX_ECO57	2	2	2	sp|P0A919|OMPX_ECO57 Outer membrane protein X OS=Escherichia coli O157:H7 OX=83334 GN=ompX PE=3 SV=1	Outer membrane protein X	ompX	1	2	2	2	1	0	0	2	1	0	1	0	0	2	1	0	1	0	0	2	1	0	22.2	22.2	22.2	18.602	171	171	0	78.551	9.9	0	0	22.2	9.9	0	24879000	5861200	0	0	15731000	3286900
tr|Q8XE22|Q8XE22_ECO57	tr|Q8XE22|Q8XE22_ECO57	1	1	1	tr|Q8XE22|Q8XE22_ECO57 Phosphofructokinase OS=Escherichia coli O157:H7 OX=83334 GN=pfkB PE=3 SV=1	Phosphofructokinase	pfkB	1	1	1	1	0	0	1	0	0	0	0	0	1	0	0	0	0	0	1	0	0	0	2.3	2.3	2.3	32.456	309	309	0	20.845	0	0	2.3	0	0	0	24546000	0	0	24546000	0	0
sp|P0A7T1|RS13_ECO57	sp|P0A7T1|RS13_ECO57	4	4	4	sp|P0A7T1|RS13_ECO57 30S ribosomal protein S13 OS=Escherichia coli O157:H7 OX=83334 GN=rpsM PE=3 SV=2	30S ribosomal protein S13	rpsM	1	4	4	4	1	0	0	4	0	0	1	0	0	4	0	0	1	0	0	4	0	0	38.1	38.1	38.1	13.099	118	118	0	66.544	11	0	0	38.1	0	0	22746000	3114000	0	0	19632000	0
sp|P0A6Z0|DNAK_ECO57	sp|P0A6Z0|DNAK_ECO57	6	6	6	sp|P0A6Z0|DNAK_ECO57 Chaperone protein DnaK OS=Escherichia coli O157:H7 OX=83334 GN=dnaK PE=3 SV=2	Chaperone protein DnaK	dnaK	1	6	6	6	0	0	0	4	3	0	0	0	0	4	3	0	0	0	0	4	3	0	20.1	20.1	20.1	69.114	638	638	0	68.825	0	0	0	12.7	11.1	0	22374000	0	0	0	14223000	8151200
sp|P0A7M0|RL27_ECO57	sp|P0A7M0|RL27_ECO57	1	1	1	sp|P0A7M0|RL27_ECO57 50S ribosomal protein L27 OS=Escherichia coli O157:H7 OX=83334 GN=rpmA PE=3 SV=2	50S ribosomal protein L27	rpmA	1	1	1	1	1	0	0	1	0	0	1	0	0	1	0	0	1	0	0	1	0	0	16.5	16.5	16.5	9.1244	85	85	0	31.311	16.5	0	0	16.5	0	0	21958000	9554600	0	0	12403000	0
tr|Q8X630|Q8X630_ECO57	tr|Q8X630|Q8X630_ECO57	4	4	4	tr|Q8X630|Q8X630_ECO57 Chromate reductase OS=Escherichia coli O157:H7 OX=83334 GN=nemA PE=4 SV=1	Chromate reductase	nemA	1	4	4	4	4	2	0	1	1	0	4	2	0	1	1	0	4	2	0	1	1	0	19.2	19.2	19.2	39.546	365	365	0	34.702	19.2	9.9	0	6.6	6.6	0	21287000	7935000	4299100	0	3663500	5389200
sp|P0A974|CSPE_ECO57	sp|P0A974|CSPE_ECO57	3	3	3	sp|P0A974|CSPE_ECO57 Cold shock-like protein CspE OS=Escherichia coli O157:H7 OX=83334 GN=cspE PE=3 SV=2	Cold shock-like protein CspE	cspE	1	3	3	3	2	0	0	3	1	0	2	0	0	3	1	0	2	0	0	3	1	0	63.8	63.8	63.8	7.4634	69	69	0	57.086	39.1	0	0	63.8	21.7	0	20768000	3725900	0	0	13616000	3426000
sp|P0A7R3|RL9_ECO57	sp|P0A7R3|RL9_ECO57	6	6	6	sp|P0A7R3|RL9_ECO57 50S ribosomal protein L9 OS=Escherichia coli O157:H7 OX=83334 GN=rplI PE=3 SV=1	50S ribosomal protein L9	rplI	1	6	6	6	3	0	0	6	1	0	3	0	0	6	1	0	3	0	0	6	1	0	45.6	45.6	45.6	15.769	149	149	0	53.226	24.8	0	0	45.6	7.4	0	20194000	2911800	0	0	14102000	3180400
sp|P0A7K4|RL7_ECO57	sp|P0A7K4|RL7_ECO57	3	3	3	sp|P0A7K4|RL7_ECO57 50S ribosomal protein L7/L12 OS=Escherichia coli O157:H7 OX=83334 GN=rplL PE=3 SV=2	50S ribosomal protein L7/L12	rplL	1	3	3	3	1	0	0	3	0	0	1	0	0	3	0	0	1	0	0	3	0	0	37.2	37.2	37.2	12.295	121	121	0	42.298	18.2	0	0	37.2	0	0	18764000	4220800	0	0	14543000	0
sp|P69788|PTGCB_ECO57	sp|P69788|PTGCB_ECO57	1	1	1	sp|P69788|PTGCB_ECO57 PTS system glucose-specific EIICB component OS=Escherichia coli O157:H7 OX=83334 GN=ptsG PE=3 SV=1	PTS system glucose-specific EIICB component	ptsG	1	1	1	1	1	0	0	1	0	0	1	0	0	1	0	0	1	0	0	1	0	0	4.2	4.2	4.2	50.676	477	477	0	69.183	4.2	0	0	4.2	0	0	17411000	4618800	0	0	12793000	0
tr|Q8X8G5|Q8X8G5_ECO57	tr|Q8X8G5|Q8X8G5_ECO57	2	2	2	tr|Q8X8G5|Q8X8G5_ECO57 Respiratory NADH dehydrogenase 2/cupric reductase OS=Escherichia coli O157:H7 OX=83334 GN=ndh PE=4 SV=1	Respiratory NADH dehydrogenase 2/cupric reductase	ndh	1	2	2	2	2	0	0	1	0	0	2	0	0	1	0	0	2	0	0	1	0	0	10.1	10.1	10.1	47.376	434	434	0	27.407	10.1	0	0	5.5	0	0	17109000	12170000	0	0	4939600	0
sp|P0A8T8|RPOC_ECO57	sp|P0A8T8|RPOC_ECO57	4	4	4	sp|P0A8T8|RPOC_ECO57 DNA-directed RNA polymerase subunit beta OS=Escherichia coli O157:H7 OX=83334 GN=rpoC PE=1 SV=1	DNA-directed RNA polymerase subunit beta	rpoC	1	4	4	4	1	0	0	4	0	0	1	0	0	4	0	0	1	0	0	4	0	0	4.8	4.8	4.8	155.16	1407	1407	0	70.436	1.4	0	0	4.8	0	0	16891000	4313500	0	0	12578000	0
sp|P0A860|TPIS_ECO57	sp|P0A860|TPIS_ECO57	2	2	2	sp|P0A860|TPIS_ECO57 Triosephosphate isomerase OS=Escherichia coli O157:H7 OX=83334 GN=tpiA PE=3 SV=1	Triosephosphate isomerase	tpiA	1	2	2	2	2	0	0	0	1	0	2	0	0	0	1	0	2	0	0	0	1	0	18	18	18	26.972	255	255	0	37.908	18	0	0	0	12.5	0	16662000	7695800	0	0	0	8966600
sp|P0A9Y8|CSPC_ECO57	sp|P0A9Y8|CSPC_ECO57	2	2	2	sp|P0A9Y8|CSPC_ECO57 Cold shock-like protein CspC OS=Escherichia coli O157:H7 OX=83334 GN=cspC PE=3 SV=2	Cold shock-like protein CspC	cspC	1	2	2	2	2	0	0	2	0	0	2	0	0	2	0	0	2	0	0	2	0	0	46.4	46.4	46.4	7.4023	69	69	0	33.424	46.4	0	0	46.4	0	0	13852000	4819700	0	0	9032100	0
sp|Q8XCT9|SYC_ECO57	sp|Q8XCT9|SYC_ECO57	5	5	5	sp|Q8XCT9|SYC_ECO57 Cysteine--tRNA ligase OS=Escherichia coli O157:H7 OX=83334 GN=cysS PE=3 SV=1	Cysteine--tRNA ligase	cysS	1	5	5	5	1	1	2	2	2	0	1	1	2	2	2	0	1	1	2	2	2	0	18.4	18.4	18.4	52.212	461	461	0	50.316	2.4	4.3	4.8	10	6.1	0	13793000	1476900	0	5198900	2665500	4452100
tr|A0A0H3JS36|A0A0H3JS36_ECO57	tr|A0A0H3JS36|A0A0H3JS36_ECO57	1	1	1	tr|A0A0H3JS36|A0A0H3JS36_ECO57 Salt-inducible ABC transporter periplasmic binding protein OS=Escherichia coli O157:H7 OX=83334 GN=osmY PE=4 SV=1	Salt-inducible ABC transporter periplasmic binding protein	osmY	1	1	1	1	1	0	0	1	1	0	1	0	0	1	1	0	1	0	0	1	1	0	9.5	9.5	9.5	21.086	201	201	0	8.8896	9.5	0	0	9.5	9.5	0	13687000	5794400	0	0	5288400	2604100
sp|P0A6P3|EFTS_ECO57	sp|P0A6P3|EFTS_ECO57	7	7	7	sp|P0A6P3|EFTS_ECO57 Elongation factor Ts OS=Escherichia coli O157:H7 OX=83334 GN=tsf PE=3 SV=2	Elongation factor Ts	tsf	1	7	7	7	2	2	0	4	2	0	2	2	0	4	2	0	2	2	0	4	2	0	32.5	32.5	32.5	30.423	283	283	0	51.448	11.7	8.8	0	21.2	8.8	0	12617000	3661200	2862500	0	3042700	3050800
sp|P0A7W9|RS8_ECO57	sp|P0A7W9|RS8_ECO57	1	1	1	sp|P0A7W9|RS8_ECO57 30S ribosomal protein S8 OS=Escherichia coli O157:H7 OX=83334 GN=rpsH PE=3 SV=2	30S ribosomal protein S8	rpsH	1	1	1	1	1	0	0	1	0	0	1	0	0	1	0	0	1	0	0	1	0	0	10.8	10.8	10.8	14.126	130	130	0	19.689	10.8	0	0	10.8	0	0	12380000	4158900	0	0	8220600	0
sp|P0ABP9|DEOD_ECO57	sp|P0ABP9|DEOD_ECO57	1	1	1	sp|P0ABP9|DEOD_ECO57 Purine nucleoside phosphorylase DeoD-type OS=Escherichia coli O157:H7 OX=83334 GN=deoD PE=1 SV=2	Purine nucleoside phosphorylase DeoD-type	deoD	1	1	1	1	1	0	0	1	1	0	1	0	0	1	1	0	1	0	0	1	1	0	10	10	10	25.95	239	239	0	12.325	10	0	0	10	10	0	12233000	3802300	0	0	5924700	2506000
sp|P0AA12|RL13_ECO57	sp|P0AA12|RL13_ECO57	2	2	2	sp|P0AA12|RL13_ECO57 50S ribosomal protein L13 OS=Escherichia coli O157:H7 OX=83334 GN=rplM PE=3 SV=1	50S ribosomal protein L13	rplM	1	2	2	2	1	1	0	2	1	0	1	1	0	2	1	0	1	1	0	2	1	0	18.3	18.3	18.3	16.018	142	142	0	18.028	4.9	4.9	0	18.3	13.4	0	12090000	2062900	2119200	0	4154900	3752500
sp|Q8X6C3|BETI_ECO57	sp|Q8X6C3|BETI_ECO57	1	1	1	sp|Q8X6C3|BETI_ECO57 HTH-type transcriptional regulator BetI OS=Escherichia coli O157:H7 OX=83334 GN=betI PE=3 SV=1	HTH-type transcriptional regulator BetI	betI	1	1	1	1	1	0	0	1	0	0	1	0	0	1	0	0	1	0	0	1	0	0	9.2	9.2	9.2	21.799	195	195	0	6.5456	9.2	0	0	9.2	0	0	11926000	5417800	0	0	6508400	0
sp|P0A6X5|HFQ_ECO57	sp|P0A6X5|HFQ_ECO57	2	2	2	sp|P0A6X5|HFQ_ECO57 RNA-binding protein Hfq OS=Escherichia coli O157:H7 OX=83334 GN=hfq PE=3 SV=2	RNA-binding protein Hfq	hfq	1	2	2	2	2	2	0	1	0	1	2	2	0	1	0	1	2	2	0	1	0	1	22.5	22.5	22.5	11.166	102	102	0	14.044	22.5	22.5	0	13.7	0	8.8	11690000	3365100	4984400	0	1435100	0
sp|P0AEU9|SKP_ECO57	sp|P0AEU9|SKP_ECO57	3	3	3	sp|P0AEU9|SKP_ECO57 Chaperone protein Skp OS=Escherichia coli O157:H7 OX=83334 GN=skp PE=3 SV=1	Chaperone protein Skp	skp	1	3	3	3	1	1	0	1	0	0	1	1	0	1	0	0	1	1	0	1	0	0	42.9	42.9	42.9	17.688	161	161	0	54.852	15.5	22.4	0	20.5	0	0	11594000	5708900	4543700	0	1341000	0
sp|P0A7N5|RL32_ECO57	sp|P0A7N5|RL32_ECO57	2	2	2	sp|P0A7N5|RL32_ECO57 50S ribosomal protein L32 OS=Escherichia coli O157:H7 OX=83334 GN=rpmF PE=3 SV=2	50S ribosomal protein L32	rpmF	1	2	2	2	2	0	0	2	1	0	2	0	0	2	1	0	2	0	0	2	1	0	43.9	43.9	43.9	6.4463	57	57	0	15.956	43.9	0	0	43.9	26.3	0	11058000	3579700	0	0	5831200	1647500
sp|P0A7R7|RS10_ECO57	sp|P0A7R7|RS10_ECO57	3	3	3	sp|P0A7R7|RS10_ECO57 30S ribosomal protein S10 OS=Escherichia coli O157:H7 OX=83334 GN=rpsJ PE=3 SV=1	30S ribosomal protein S10	rpsJ	1	3	3	3	3	0	0	3	1	0	3	0	0	3	1	0	3	0	0	3	1	0	24.3	24.3	24.3	11.735	103	103	0	58.259	24.3	0	0	24.3	9.7	0	10805000	1365700	0	0	9439700	0
sp|P0ABB2|ATPA_ECO57	sp|P0ABB2|ATPA_ECO57	2	2	2	sp|P0ABB2|ATPA_ECO57 ATP synthase subunit alpha OS=Escherichia coli O157:H7 OX=83334 GN=atpA PE=3 SV=1	ATP synthase subunit alpha	atpA	1	2	2	2	0	0	0	2	0	0	0	0	0	2	0	0	0	0	0	2	0	0	7.2	7.2	7.2	55.221	513	513	0	91.12	0	0	0	7.2	0	0	10158000	0	0	0	10158000	0
sp|P60424|RL2_ECO57	sp|P60424|RL2_ECO57	3	3	3	sp|P60424|RL2_ECO57 50S ribosomal protein L2 OS=Escherichia coli O157:H7 OX=83334 GN=rplB PE=3 SV=2	50S ribosomal protein L2	rplB	1	3	3	3	3	0	0	1	1	0	3	0	0	1	1	0	3	0	0	1	1	0	18.3	18.3	18.3	29.86	273	273	0	25.09	18.3	0	0	6.2	8.1	0	9912000	5425900	0	0	2345500	2140600
sp|P0ABB6|ATPB_ECO57	sp|P0ABB6|ATPB_ECO57	2	2	2	sp|P0ABB6|ATPB_ECO57 ATP synthase subunit beta OS=Escherichia coli O157:H7 OX=83334 GN=atpD PE=3 SV=2	ATP synthase subunit beta	atpD	1	2	2	2	1	0	0	2	0	0	1	0	0	2	0	0	1	0	0	2	0	0	7.2	7.2	7.2	50.325	460	460	0	152.97	3.3	0	0	7.2	0	0	9780000	3167800	0	0	6612100	0
sp|P0A7K8|RL19_ECO57	sp|P0A7K8|RL19_ECO57	1	1	1	sp|P0A7K8|RL19_ECO57 50S ribosomal protein L19 OS=Escherichia coli O157:H7 OX=83334 GN=rplS PE=3 SV=2	50S ribosomal protein L19	rplS	1	1	1	1	0	0	0	1	0	0	0	0	0	1	0	0	0	0	0	1	0	0	13	13	13	13.133	115	115	0	19.366	0	0	0	13	0	0	9420500	0	0	0	9420500	0
sp|Q8X902|LUXS_ECO57	sp|Q8X902|LUXS_ECO57	2	2	2	sp|Q8X902|LUXS_ECO57 S-ribosylhomocysteine lyase OS=Escherichia coli O157:H7 OX=83334 GN=luxS PE=3 SV=3	S-ribosylhomocysteine lyase	luxS	1	2	2	2	1	0	0	0	1	1	1	0	0	0	1	1	1	0	0	0	1	1	16.4	16.4	16.4	19.444	171	171	0	13.583	9.4	0	0	0	7	7	9016700	1114900	0	0	0	4646100
sp|P0ADY9|RL16_ECO57	sp|P0ADY9|RL16_ECO57	2	2	2	sp|P0ADY9|RL16_ECO57 50S ribosomal protein L16 OS=Escherichia coli O157:H7 OX=83334 GN=rplP PE=3 SV=1	50S ribosomal protein L16	rplP	1	2	2	2	1	0	0	2	1	0	1	0	0	2	1	0	1	0	0	2	1	0	22.1	22.1	22.1	15.281	136	136	0	33.708	11.8	0	0	22.1	11.8	0	8980800	927090	0	0	6743700	1310000
sp|P0ADG8|IMDH_ECO57	sp|P0ADG8|IMDH_ECO57	1	1	1	sp|P0ADG8|IMDH_ECO57 Inosine-5-monophosphate dehydrogenase OS=Escherichia coli O157:H7 OX=83334 GN=guaB PE=3 SV=1	Inosine-5-monophosphate dehydrogenase	guaB	1	1	1	1	1	0	0	1	0	0	1	0	0	1	0	0	1	0	0	1	0	0	3.3	3.3	3.3	52.022	488	488	0	6.3164	3.3	0	0	3.3	0	0	8590400	3020700	0	0	5569700	0
sp|P0A819|METK_ECO57	sp|P0A819|METK_ECO57	1	1	1	sp|P0A819|METK_ECO57 S-adenosylmethionine synthase OS=Escherichia coli O157:H7 OX=83334 GN=metK PE=3 SV=2	S-adenosylmethionine synthase	metK	1	1	1	1	1	0	0	1	0	0	1	0	0	1	0	0	1	0	0	1	0	0	6.2	6.2	6.2	41.951	384	384	0	72.24	6.2	0	0	6.2	0	0	7915300	3785200	0	0	4130100	0
sp|P62401|RL5_ECO57	sp|P62401|RL5_ECO57	6	6	6	sp|P62401|RL5_ECO57 50S ribosomal protein L5 OS=Escherichia coli O157:H7 OX=83334 GN=rplE PE=3 SV=2	50S ribosomal protein L5	rplE	1	6	6	6	3	0	0	5	1	0	3	0	0	5	1	0	3	0	0	5	1	0	43	43	43	20.301	179	179	0	111.57	26.3	0	0	34.6	11.7	0	7578700	3621400	0	0	0	3957300
sp|P0A7V2|RS2_ECO57	sp|P0A7V2|RS2_ECO57	2	2	2	sp|P0A7V2|RS2_ECO57 30S ribosomal protein S2 OS=Escherichia coli O157:H7 OX=83334 GN=rpsB PE=3 SV=2	30S ribosomal protein S2	rpsB	1	2	2	2	1	0	0	2	0	0	1	0	0	2	0	0	1	0	0	2	0	0	14.9	14.9	14.9	26.743	241	241	0	21.818	9.1	0	0	14.9	0	0	7065800	2251600	0	0	4814200	0
tr|Q8XDQ0|Q8XDQ0_ECO57	tr|Q8XDQ0|Q8XDQ0_ECO57	2	2	2	tr|Q8XDQ0|Q8XDQ0_ECO57 Fumarate reductase flavoprotein subunit OS=Escherichia coli O157:H7 OX=83334 GN=frdA PE=3 SV=1	Fumarate reductase flavoprotein subunit	frdA	1	2	2	2	1	0	0	1	0	0	1	0	0	1	0	0	1	0	0	1	0	0	5.8	5.8	5.8	65.97	602	602	0	14.646	3.2	0	0	2.7	0	0	5663300	3453300	0	0	2210000	0
sp|P0A7J5|RL10_ECO57	sp|P0A7J5|RL10_ECO57	2	2	2	sp|P0A7J5|RL10_ECO57 50S ribosomal protein L10 OS=Escherichia coli O157:H7 OX=83334 GN=rplJ PE=3 SV=2	50S ribosomal protein L10	rplJ	1	2	2	2	1	0	0	1	0	0	1	0	0	1	0	0	1	0	0	1	0	0	17.6	17.6	17.6	17.711	165	165	0	14.706	9.7	0	0	7.9	0	0	5005900	467310	0	0	4538600	0
sp|P60725|RL4_ECO57	sp|P60725|RL4_ECO57	2	2	2	sp|P60725|RL4_ECO57 50S ribosomal protein L4 OS=Escherichia coli O157:H7 OX=83334 GN=rplD PE=3 SV=1	50S ribosomal protein L4	rplD	1	2	2	2	1	0	0	1	1	0	1	0	0	1	1	0	1	0	0	1	1	0	15.4	15.4	15.4	22.086	201	201	0	26.395	7.5	0	0	7.5	8	0	4766800	1592600	0	0	1787300	1386900
sp|Q8X5W7|LAMB_ECO57	sp|Q8X5W7|LAMB_ECO57	1	1	1	sp|Q8X5W7|LAMB_ECO57 Maltoporin OS=Escherichia coli O157:H7 OX=83334 GN=lamB PE=3 SV=1	Maltoporin	lamB	1	1	1	1	1	0	0	1	0	0	1	0	0	1	0	0	1	0	0	1	0	0	5.2	5.2	5.2	49.968	446	446	0	11.256	5.2	0	0	5.2	0	0	4727800	1253800	0	0	3474000	0
sp|P0AFB6|NTRB_ECO57	sp|P0AFB6|NTRB_ECO57	2	2	2	sp|P0AFB6|NTRB_ECO57 Sensory histidine kinase/phosphatase NtrB OS=Escherichia coli O157:H7 OX=83334 GN=glnL PE=3 SV=1	Sensory histidine kinase/phosphatase NtrB	glnL	1	2	2	2	0	0	0	2	0	0	0	0	0	2	0	0	0	0	0	2	0	0	5.4	5.4	5.4	38.556	349	349	0	11.757	0	0	0	5.4	0	0	4442600	0	0	0	4442600	0
tr|Q8X9H1|Q8X9H1_ECO57	tr|Q8X9H1|Q8X9H1_ECO57	1	1	1	tr|Q8X9H1|Q8X9H1_ECO57 Acyl-CoA esterase OS=Escherichia coli O157:H7 OX=83334 GN=ybfF PE=4 SV=1	Acyl-CoA esterase	ybfF	1	1	1	1	0	0	0	1	1	0	0	0	0	1	1	0	0	0	0	1	1	0	5.5	5.5	5.5	28.477	254	254	0	7.3996	0	0	0	5.5	5.5	0	4441500	0	0	0	2264700	2176800
tr|Q8XCU0|Q8XCU0_ECO57	tr|Q8XCU0|Q8XCU0_ECO57	2	2	2	tr|Q8XCU0|Q8XCU0_ECO57 Peptidyl-prolyl cis-trans isomerase OS=Escherichia coli O157:H7 OX=83334 GN=ppiB PE=3 SV=1	Peptidyl-prolyl cis-trans isomerase	ppiB	1	2	2	2	1	1	1	1	0	0	1	1	1	1	0	0	1	1	1	1	0	0	18.3	18.3	18.3	18.167	164	164	0	14.178	10.4	10.4	7.9	10.4	0	0	4224100	907450	0	2450300	866350	0
sp|P58116|YHHW_ECO57	sp|P58116|YHHW_ECO57	1	1	1	sp|P58116|YHHW_ECO57 Quercetin 2,3-dioxygenase OS=Escherichia coli O157:H7 OX=83334 GN=yhhW PE=3 SV=1	Quercetin 2,3-dioxygenase	yhhW	1	1	1	1	0	1	0	0	1	0	0	1	0	0	1	0	0	1	0	0	1	0	7.4	7.4	7.4	26.291	231	231	0	9.0121	0	7.4	0	0	7.4	0	3924400	0	1510600	0	0	2413800
sp|P0A7W3|RS5_ECO57	sp|P0A7W3|RS5_ECO57	1	1	1	sp|P0A7W3|RS5_ECO57 30S ribosomal protein S5 OS=Escherichia coli O157:H7 OX=83334 GN=rpsE PE=3 SV=2	30S ribosomal protein S5	rpsE	1	1	1	1	1	0	0	1	0	0	1	0	0	1	0	0	1	0	0	1	0	0	9.6	9.6	9.6	17.603	167	167	0	26.775	9.6	0	0	9.6	0	0	3711100	1489400	0	0	2221700	0
sp|P0AG57|RL6_ECO57	sp|P0AG57|RL6_ECO57	2	2	2	sp|P0AG57|RL6_ECO57 50S ribosomal protein L6 OS=Escherichia coli O157:H7 OX=83334 GN=rplF PE=3 SV=2	50S ribosomal protein L6	rplF	1	2	2	2	2	0	0	1	0	0	2	0	0	1	0	0	2	0	0	1	0	0	15.3	15.3	15.3	18.904	177	177	0	20.655	15.3	0	0	9	0	0	3630500	2112700	0	0	1517800	0
sp|P61177|RL22_ECO57	sp|P61177|RL22_ECO57	3	3	3	sp|P61177|RL22_ECO57 50S ribosomal protein L22 OS=Escherichia coli O157:H7 OX=83334 GN=rplV PE=3 SV=1	50S ribosomal protein L22	rplV	1	3	3	3	0	0	0	2	1	0	0	0	0	2	1	0	0	0	0	2	1	0	41.8	41.8	41.8	12.226	110	110	0	24.551	0	0	0	20	21.8	0	3630000	0	0	0	1073400	2556600
sp|P0A6K8|DEOB_ECO57	sp|P0A6K8|DEOB_ECO57	4	4	4	sp|P0A6K8|DEOB_ECO57 Phosphopentomutase OS=Escherichia coli O157:H7 OX=83334 GN=deoB PE=3 SV=1	Phosphopentomutase	deoB	1	4	4	4	3	0	0	1	0	0	3	0	0	1	0	0	3	0	0	1	0	0	14	14	14	44.369	407	407	0	26.363	10.6	0	0	3.4	0	0	3577700	1858600	0	0	1719100	0
sp|P0A871|TALB_ECO57;sp|P0A869|TALA_ECO57	sp|P0A871|TALB_ECO57	3;1	3;1	3;1	sp|P0A871|TALB_ECO57 Transaldolase B OS=Escherichia coli O157:H7 OX=83334 GN=talB PE=3 SV=2	Transaldolase B	talB	2	3	3	3	1	0	0	3	0	0	1	0	0	3	0	0	1	0	0	3	0	0	14.2	14.2	14.2	35.219	317	317;316	0	25.716	4.1	0	0	14.2	0	0	3537400	644400	0	0	2893000	0
sp|P0ABA5|ATPD_ECO57	sp|P0ABA5|ATPD_ECO57	1	1	1	sp|P0ABA5|ATPD_ECO57 ATP synthase subunit delta OS=Escherichia coli O157:H7 OX=83334 GN=atpH PE=3 SV=1	ATP synthase subunit delta	atpH	1	1	1	1	0	0	0	1	0	0	0	0	0	1	0	0	0	0	0	1	0	0	13.6	13.6	13.6	19.332	177	177	0	11.603	0	0	0	13.6	0	0	3500600	0	0	0	3500600	0
sp|P0A7L5|RL20_ECO57	sp|P0A7L5|RL20_ECO57	2	2	2	sp|P0A7L5|RL20_ECO57 50S ribosomal protein L20 OS=Escherichia coli O157:H7 OX=83334 GN=rplT PE=3 SV=2	50S ribosomal protein L20	rplT	1	2	2	2	0	0	0	2	0	0	0	0	0	2	0	0	0	0	0	2	0	0	16.1	16.1	16.1	13.497	118	118	0	12.238	0	0	0	16.1	0	0	3277800	0	0	0	3277800	0
sp|P60440|RL3_ECO57	sp|P60440|RL3_ECO57	1	1	1	sp|P60440|RL3_ECO57 50S ribosomal protein L3 OS=Escherichia coli O157:H7 OX=83334 GN=rplC PE=3 SV=1	50S ribosomal protein L3	rplC	1	1	1	1	0	0	0	1	0	0	0	0	0	1	0	0	0	0	0	1	0	0	8.6	8.6	8.6	22.243	209	209	0	7.0372	0	0	0	8.6	0	0	3209500	0	0	0	3209500	0
tr|Q8X8L3|Q8X8L3_ECO57	tr|Q8X8L3|Q8X8L3_ECO57	2	2	2	tr|Q8X8L3|Q8X8L3_ECO57 Uridine phosphorylase OS=Escherichia coli O157:H7 OX=83334 GN=udp PE=3 SV=1	Uridine phosphorylase	udp	1	2	2	2	1	1	0	0	0	0	1	1	0	0	0	0	1	1	0	0	0	0	18.6	18.6	18.6	27.15	253	253	0	17.728	9.1	9.5	0	0	0	0	3193400	1415200	1778200	0	0	0
sp|P0A9Y1|CSPA_ECO57	sp|P0A9Y1|CSPA_ECO57	2	2	2	sp|P0A9Y1|CSPA_ECO57 Cold shock protein CspA OS=Escherichia coli O157:H7 OX=83334 GN=cspA PE=3 SV=2	Cold shock protein CspA	cspA	1	2	2	2	0	0	0	2	0	0	0	0	0	2	0	0	0	0	0	2	0	0	45.7	45.7	45.7	7.4032	70	70	0	15.381	0	0	0	45.7	0	0	3118000	0	0	0	3118000	0
sp|P0A864|TPX_ECO57	sp|P0A864|TPX_ECO57	1	1	1	sp|P0A864|TPX_ECO57 Thiol peroxidase OS=Escherichia coli O157:H7 OX=83334 GN=tpx PE=3 SV=2	Thiol peroxidase	tpx	1	1	1	1	1	0	0	1	0	0	1	0	0	1	0	0	1	0	0	1	0	0	10.1	10.1	10.1	17.835	168	168	0	20.753	10.1	0	0	10.1	0	0	2988900	1302700	0	0	1686100	0
sp|P0ADY5|RL14_ECO57	sp|P0ADY5|RL14_ECO57	1	1	1	sp|P0ADY5|RL14_ECO57 50S ribosomal protein L14 OS=Escherichia coli O157:H7 OX=83334 GN=rplN PE=3 SV=1	50S ribosomal protein L14	rplN	1	1	1	1	1	0	0	1	0	0	1	0	0	1	0	0	1	0	0	1	0	0	13.8	13.8	13.8	13.541	123	123	0	8.2886	13.8	0	0	13.8	0	0	2746400	914740	0	0	1831700	0
tr|Q8XBL3|Q8XBL3_ECO57	tr|Q8XBL3|Q8XBL3_ECO57	1	1	1	tr|Q8XBL3|Q8XBL3_ECO57 Phosphoenolpyruvate-protein phosphotransferase OS=Escherichia coli O157:H7 OX=83334 GN=ptsI PE=3 SV=1	Phosphoenolpyruvate-protein phosphotransferase	ptsI	1	1	1	1	1	0	0	1	0	0	1	0	0	1	0	0	1	0	0	1	0	0	2.4	2.4	2.4	63.533	575	575	0	10.102	2.4	0	0	2.4	0	0	2662400	1143100	0	0	1519300	0
sp|P0A7D3|PTH_ECO57	sp|P0A7D3|PTH_ECO57	2	2	2	sp|P0A7D3|PTH_ECO57 Peptidyl-tRNA hydrolase OS=Escherichia coli O157:H7 OX=83334 GN=pth PE=3 SV=1	Peptidyl-tRNA hydrolase	pth	1	2	2	2	2	0	0	0	1	0	2	0	0	0	1	0	2	0	0	0	1	0	13.4	13.4	13.4	21.082	194	194	0	14.855	13.4	0	0	0	7.7	0	2604000	838540	0	0	0	1765400
tr|Q8XCB6|Q8XCB6_ECO57	tr|Q8XCB6|Q8XCB6_ECO57	1	1	1	tr|Q8XCB6|Q8XCB6_ECO57 Outer membrane protein OmpW OS=Escherichia coli O157:H7 OX=83334 GN=ompW PE=4 SV=1	Outer membrane protein OmpW	ompW	1	1	1	1	1	0	0	1	0	0	1	0	0	1	0	0	1	0	0	1	0	0	8	8	8	22.923	212	212	0	34.526	8	0	0	8	0	0	2548100	1131000	0	0	1417000	0
sp|P0A7Z6|RPOA_ECO57	sp|P0A7Z6|RPOA_ECO57	3	3	3	sp|P0A7Z6|RPOA_ECO57 DNA-directed RNA polymerase subunit alpha OS=Escherichia coli O157:H7 OX=83334 GN=rpoA PE=1 SV=1	DNA-directed RNA polymerase subunit alpha	rpoA	1	3	3	3	1	0	0	3	0	0	1	0	0	3	0	0	1	0	0	3	0	0	15.5	15.5	15.5	36.511	329	329	0	20.459	7.9	0	0	15.5	0	0	2543200	0	0	0	2543200	0
sp|P0A709|IF3_ECO57	sp|P0A709|IF3_ECO57	1	1	1	sp|P0A709|IF3_ECO57 Translation initiation factor IF-3 OS=Escherichia coli O157:H7 OX=83334 GN=infC PE=3 SV=1	Translation initiation factor IF-3	infC	1	1	1	1	0	0	0	1	0	0	0	0	0	1	0	0	0	0	0	1	0	0	8.3	8.3	8.3	20.564	180	180	0	19.15	0	0	0	8.3	0	0	2356900	0	0	0	2356900	0
sp|P58694|SYN_ECO57	sp|P58694|SYN_ECO57	1	1	1	sp|P58694|SYN_ECO57 Asparagine--tRNA ligase OS=Escherichia coli O157:H7 OX=83334 GN=asnS PE=3 SV=2	Asparagine--tRNA ligase	asnS	1	1	1	1	0	0	0	1	0	0	0	0	0	1	0	0	0	0	0	1	0	0	4.5	4.5	4.5	52.614	466	466	0	7.203	0	0	0	4.5	0	0	2326100	0	0	0	2326100	0
sp|P0A8B7|YBAB_ECO57	sp|P0A8B7|YBAB_ECO57	1	1	1	sp|P0A8B7|YBAB_ECO57 Nucleoid-associated protein YbaB OS=Escherichia coli O157:H7 OX=83334 GN=ybaB PE=3 SV=1	Nucleoid-associated protein YbaB	ybaB	1	1	1	1	0	0	0	1	0	0	0	0	0	1	0	0	0	0	0	1	0	0	18.3	18.3	18.3	12.015	109	109	0	7.0091	0	0	0	18.3	0	0	2205100	0	0	0	2205100	0
sp|P0A851|TIG_ECO57	sp|P0A851|TIG_ECO57	2	2	2	sp|P0A851|TIG_ECO57 Trigger factor OS=Escherichia coli O157:H7 OX=83334 GN=tig PE=3 SV=1	Trigger factor	tig	1	2	2	2	0	0	0	2	0	0	0	0	0	2	0	0	0	0	0	2	0	0	6.9	6.9	6.9	48.192	432	432	0	131.16	0	0	0	6.9	0	0	2132000	0	0	0	2132000	0
tr|Q8X9T0|Q8X9T0_ECO57	tr|Q8X9T0|Q8X9T0_ECO57	1	1	1	tr|Q8X9T0|Q8X9T0_ECO57 ATP-dependent helicase OS=Escherichia coli O157:H7 OX=83334 GN=hrpA PE=4 SV=2	ATP-dependent helicase	hrpA	1	1	1	1	0	0	0	0	1	0	0	0	0	0	1	0	0	0	0	0	1	0	0.6	0.6	0.6	148.96	1300	1300	0	6.6751	0	0	0	0	0.6	0	2042400	0	0	0	0	2042400
sp|P0A7V5|RS3_ECO57	sp|P0A7V5|RS3_ECO57	1	1	1	sp|P0A7V5|RS3_ECO57 30S ribosomal protein S3 OS=Escherichia coli O157:H7 OX=83334 GN=rpsC PE=3 SV=2	30S ribosomal protein S3	rpsC	1	1	1	1	0	0	0	1	0	0	0	0	0	1	0	0	0	0	0	1	0	0	9	9	9	25.983	233	233	0	9.4676	0	0	0	9	0	0	1829800	0	0	0	1829800	0
sp|P0C020|RL18_ECO57	sp|P0C020|RL18_ECO57	2	2	2	sp|P0C020|RL18_ECO57 50S ribosomal protein L18 OS=Escherichia coli O157:H7 OX=83334 GN=rplR PE=3 SV=1	50S ribosomal protein L18	rplR	1	2	2	2	1	0	0	1	0	0	1	0	0	1	0	0	1	0	0	1	0	0	27.4	27.4	27.4	12.769	117	117	0	12.739	7.7	0	0	19.7	0	0	1736600	673630	0	0	1063000	0
sp|P0A706|IF2_ECO57	sp|P0A706|IF2_ECO57	1	1	1	sp|P0A706|IF2_ECO57 Translation initiation factor IF-2 OS=Escherichia coli O157:H7 OX=83334 GN=infB PE=3 SV=1	Translation initiation factor IF-2	infB	1	1	1	1	0	0	0	1	0	0	0	0	0	1	0	0	0	0	0	1	0	0	1.8	1.8	1.8	97.349	890	890	0	6.5467	0	0	0	1.8	0	0	1647300	0	0	0	1647300	0
sp|P60908|SYH_ECO57	sp|P60908|SYH_ECO57	1	1	1	sp|P60908|SYH_ECO57 Histidine--tRNA ligase OS=Escherichia coli O157:H7 OX=83334 GN=hisS PE=3 SV=2	Histidine--tRNA ligase	hisS	1	1	1	1	1	0	0	1	0	0	1	0	0	1	0	0	1	0	0	1	0	0	4.2	4.2	4.2	47.029	424	424	0	6.856	4.2	0	0	4.2	0	0	1558500	486790	0	0	1071700	0
sp|P0ABC5|HFLC_ECO57	sp|P0ABC5|HFLC_ECO57	1	1	1	sp|P0ABC5|HFLC_ECO57 Modulator of FtsH protease HflC OS=Escherichia coli O157:H7 OX=83334 GN=hflC PE=3 SV=1	Modulator of FtsH protease HflC	hflC	1	1	1	1	1	0	0	0	0	0	1	0	0	0	0	0	1	0	0	0	0	0	5.4	5.4	5.4	37.649	334	334	0	9.1831	5.4	0	0	0	0	0	1553200	1553200	0	0	0	0
sp|P0AF14|MTNN_ECO57	sp|P0AF14|MTNN_ECO57	1	1	1	sp|P0AF14|MTNN_ECO57 5-methylthioadenosine/S-adenosylhomocysteine nucleosidase OS=Escherichia coli O157:H7 OX=83334 GN=mtnN PE=1 SV=1	5-methylthioadenosine/S-adenosylhomocysteine nucleosidase	mtnN	1	1	1	1	1	0	0	0	0	0	1	0	0	0	0	0	1	0	0	0	0	0	9.9	9.9	9.9	24.354	232	232	0	14.195	9.9	0	0	0	0	0	1546100	1546100	0	0	0	0
sp|P69812|PTFAH_ECO57	sp|P69812|PTFAH_ECO57	1	1	1	sp|P69812|PTFAH_ECO57 Multiphosphoryl transfer protein OS=Escherichia coli O157:H7 OX=83334 GN=fruB PE=3 SV=1	Multiphosphoryl transfer protein	fruB	1	1	1	1	0	0	0	1	0	0	0	0	0	1	0	0	0	0	0	1	0	0	6.4	6.4	6.4	39.647	376	376	0	8.7935	0	0	0	6.4	0	0	1539900	0	0	0	1539900	0
sp|Q8X926|6PGL_ECO57	sp|Q8X926|6PGL_ECO57	1	1	1	sp|Q8X926|6PGL_ECO57 6-phosphogluconolactonase OS=Escherichia coli O157:H7 OX=83334 GN=pgl PE=3 SV=1	6-phosphogluconolactonase	pgl	1	1	1	1	1	0	0	0	0	0	1	0	0	0	0	0	1	0	0	0	0	0	5.7	5.7	5.7	36.39	331	331	0	6.9314	5.7	0	0	0	0	0	1248500	1248500	0	0	0	0
sp|P0ADZ9|YAJC_ECO57	sp|P0ADZ9|YAJC_ECO57	1	1	1	sp|P0ADZ9|YAJC_ECO57 Sec translocon accessory complex subunit YajC OS=Escherichia coli O157:H7 OX=83334 GN=yajC PE=3 SV=1	Sec translocon accessory complex subunit YajC	yajC	1	1	1	1	0	0	0	1	0	0	0	0	0	1	0	0	0	0	0	1	0	0	18.2	18.2	18.2	11.887	110	110	0	7.8041	0	0	0	18.2	0	0	1223100	0	0	0	1223100	0
tr|A0A0H3JH81|A0A0H3JH81_ECO57	tr|A0A0H3JH81|A0A0H3JH81_ECO57	1	1	1	tr|A0A0H3JH81|A0A0H3JH81_ECO57 3-oxoacyl-[acyl-carrier-protein] synthase I OS=Escherichia coli O157:H7 OX=83334 GN=fabB PE=3 SV=1	3-oxoacyl-[acyl-carrier-protein] synthase I	fabB	1	1	1	1	1	0	0	1	0	0	1	0	0	1	0	0	1	0	0	1	0	0	7.4	7.4	7.4	42.613	406	406	0	8.8386	7.4	0	0	7.4	0	0	1187200	0	0	0	1187200	0
sp|P0A719|KPRS_ECO57	sp|P0A719|KPRS_ECO57	1	1	1	sp|P0A719|KPRS_ECO57 Ribose-phosphate pyrophosphokinase OS=Escherichia coli O157:H7 OX=83334 GN=prs PE=3 SV=2	Ribose-phosphate pyrophosphokinase	prs	1	1	1	1	0	0	0	1	0	0	0	0	0	1	0	0	0	0	0	1	0	0	6	6	6	34.218	315	315	0	10.549	0	0	0	6	0	0	996530	0	0	0	996530	0
tr|A0A0H3JJM9|A0A0H3JJM9_ECO57	tr|A0A0H3JJM9|A0A0H3JJM9_ECO57	1	1	1	tr|A0A0H3JJM9|A0A0H3JJM9_ECO57 Uncharacterized protein OS=Escherichia coli O157:H7 OX=83334 GN=ygaU PE=4 SV=1	Uncharacterized protein	ygaU	1	1	1	1	0	0	0	1	0	0	0	0	0	1	0	0	0	0	0	1	0	0	12.8	12.8	12.8	16.036	149	149	0	10.832	0	0	0	12.8	0	0	945240	0	0	0	945240	0
sp|P66607|RS7_ECO57	sp|P66607|RS7_ECO57	1	1	1	sp|P66607|RS7_ECO57 30S ribosomal protein S7 OS=Escherichia coli O157:H7 OX=83334 GN=rpsG PE=3 SV=2	30S ribosomal protein S7	rpsG	1	1	1	1	0	0	0	1	0	0	0	0	0	1	0	0	0	0	0	1	0	0	10.9	10.9	10.9	17.604	156	156	0.006135	6.301	0	0	0	10.9	0	0	909020	0	0	0	909020	0
sp|P67911|HLDD_ECO57	sp|P67911|HLDD_ECO57	1	1	1	sp|P67911|HLDD_ECO57 ADP-L-glycero-D-manno-heptose-6-epimerase OS=Escherichia coli O157:H7 OX=83334 GN=hldD PE=1 SV=1	ADP-L-glycero-D-manno-heptose-6-epimerase	hldD	1	1	1	1	1	0	0	0	0	0	1	0	0	0	0	0	1	0	0	0	0	0	5.2	5.2	5.2	34.893	310	310	0	6.3246	5.2	0	0	0	0	0	817140	817140	0	0	0	0
sp|P0A9P2|DLDH_ECO57	sp|P0A9P2|DLDH_ECO57	2	2	2	sp|P0A9P2|DLDH_ECO57 Dihydrolipoyl dehydrogenase OS=Escherichia coli O157:H7 OX=83334 GN=lpdA PE=3 SV=2	Dihydrolipoyl dehydrogenase	lpdA	1	2	2	2	0	0	0	2	0	0	0	0	0	2	0	0	0	0	0	2	0	0	5.3	5.3	5.3	50.688	474	474	0	13.005	0	0	0	5.3	0	0	805120	0	0	0	805120	0
tr|Q8XE17|Q8XE17_ECO57	tr|Q8XE17|Q8XE17_ECO57	1	1	1	tr|Q8XE17|Q8XE17_ECO57 Periplasmic glycerophosphodiester phosphodiesterase OS=Escherichia coli O157:H7 OX=83334 GN=glpQ PE=4 SV=1	Periplasmic glycerophosphodiester phosphodiesterase	glpQ	1	1	1	1	1	0	0	0	0	0	1	0	0	0	0	0	1	0	0	0	0	0	7.5	7.5	7.5	40.856	358	358	0	6.7477	7.5	0	0	0	0	0	707890	707890	0	0	0	0
sp|P0AC61|GLRX2_ECO57	sp|P0AC61|GLRX2_ECO57	1	1	1	sp|P0AC61|GLRX2_ECO57 Glutaredoxin 2 OS=Escherichia coli O157:H7 OX=83334 GN=grxB PE=3 SV=1	Glutaredoxin 2	grxB	1	1	1	1	1	0	0	0	0	0	1	0	0	0	0	0	1	0	0	0	0	0	8.8	8.8	8.8	24.35	215	215	0	11.719	8.8	0	0	0	0	0	633030	633030	0	0	0	0
tr|Q7DBF8|Q7DBF8_ECO57	tr|Q7DBF8|Q7DBF8_ECO57	1	1	1	tr|Q7DBF8|Q7DBF8_ECO57 6-phosphogluconate dehydrogenase, decarboxylating OS=Escherichia coli O157:H7 OX=83334 GN=gnd PE=3 SV=1	6-phosphogluconate dehydrogenase, decarboxylating	gnd	1	1	1	1	1	0	0	1	0	0	1	0	0	1	0	0	1	0	0	1	0	0	5.3	5.3	5.3	51.477	468	468	0	8.0376	5.3	0	0	5.3	0	0	632920	632920	0	0	0	0
sp|P0A7P7|RL34_ECO57	sp|P0A7P7|RL34_ECO57	1	1	1	sp|P0A7P7|RL34_ECO57 50S ribosomal protein L34 OS=Escherichia coli O157:H7 OX=83334 GN=rpmH PE=3 SV=1	50S ribosomal protein L34	rpmH	1	1	1	1	0	0	0	1	0	0	0	0	0	1	0	0	0	0	0	1	0	0	17.4	17.4	17.4	5.3803	46	46	0	6.4061	0	0	0	17.4	0	0	0	0	0	0	0	0
sp|P0A7U9|RS20_ECO57	sp|P0A7U9|RS20_ECO57	1	1	1	sp|P0A7U9|RS20_ECO57 30S ribosomal protein S20 OS=Escherichia coli O157:H7 OX=83334 GN=rpsT PE=3 SV=2	30S ribosomal protein S20	rpsT	1	1	1	1	1	0	0	0	0	0	1	0	0	0	0	0	1	0	0	0	0	0	12.6	12.6	12.6	9.6843	87	87	0	6.4839	12.6	0	0	0	0	0	0	0	0	0	0	0
sp|P0A6G1|CH10_ECO57	sp|P0A6G1|CH10_ECO57	1	1	1	sp|P0A6G1|CH10_ECO57 10 kDa chaperonin OS=Escherichia coli O157:H7 OX=83334 GN=groS PE=3 SV=1	10 kDa chaperonin	groS	1	1	1	1	0	0	0	1	0	0	0	0	0	1	0	0	0	0	0	1	0	0	14.4	14.4	14.4	10.387	97	97	0	7.558	0	0	0	14.4	0	0	0	0	0	0	0	0
sp|P0A7S1|RS11_ECO57	sp|P0A7S1|RS11_ECO57	1	1	1	sp|P0A7S1|RS11_ECO57 30S ribosomal protein S11 OS=Escherichia coli O157:H7 OX=83334 GN=rpsK PE=3 SV=2	30S ribosomal protein S11	rpsK	1	1	1	1	0	0	0	1	0	0	0	0	0	1	0	0	0	0	0	1	0	0	12.4	12.4	12.4	13.845	129	129	0	6.3524	0	0	0	12.4	0	0	0	0	0	0	0	0
sp|P0A7X5|RS9_ECO57	sp|P0A7X5|RS9_ECO57	1	1	1	sp|P0A7X5|RS9_ECO57 30S ribosomal protein S9 OS=Escherichia coli O157:H7 OX=83334 GN=rpsI PE=3 SV=2	30S ribosomal protein S9	rpsI	1	1	1	1	1	0	0	0	0	0	1	0	0	0	0	0	1	0	0	0	0	0	10.8	10.8	10.8	14.856	130	130	0	6.3454	10.8	0	0	0	0	0	0	0	0	0	0	0
sp|P0A7Z2|RPIA_ECO57	sp|P0A7Z2|RPIA_ECO57	1	1	1	sp|P0A7Z2|RPIA_ECO57 Ribose-5-phosphate isomerase A OS=Escherichia coli O157:H7 OX=83334 GN=rpiA PE=3 SV=1	Ribose-5-phosphate isomerase A	rpiA	1	1	1	1	0	0	0	0	1	1	0	0	0	0	1	1	0	0	0	0	1	1	3.7	3.7	3.7	22.86	219	219	0	6.4967	0	0	0	0	3.7	3.7	0	0	0	0	0	0
sp|P0A8F9|UVRB_ECO57	sp|P0A8F9|UVRB_ECO57	1	1	1	sp|P0A8F9|UVRB_ECO57 UvrABC system protein B OS=Escherichia coli O157:H7 OX=83334 GN=uvrB PE=3 SV=2	UvrABC system protein B	uvrB	1	1	1	1	0	0	0	0	0	1	0	0	0	0	0	1	0	0	0	0	0	1	1.5	1.5	1.5	76.225	673	673	1	-2	0	0	0	0	0	1.5	0	0	0	0	0	0
sp|P0A997|GLPC_ECO57	sp|P0A997|GLPC_ECO57	1	1	1	sp|P0A997|GLPC_ECO57 Anaerobic glycerol-3-phosphate dehydrogenase subunit C OS=Escherichia coli O157:H7 OX=83334 GN=glpC PE=3 SV=1	Anaerobic glycerol-3-phosphate dehydrogenase subunit C	glpC	1	1	1	1	0	0	0	0	1	1	0	0	0	0	1	1	0	0	0	0	1	1	2.5	2.5	2.5	44.108	396	396	1	-2	0	0	0	0	2.5	2.5	0	0	0	0	0	0
sp|P0AA27|THIO_ECO57	sp|P0AA27|THIO_ECO57	1	1	1	sp|P0AA27|THIO_ECO57 Thioredoxin 1 OS=Escherichia coli O157:H7 OX=83334 GN=trxA PE=1 SV=2	Thioredoxin 1	trxA	1	1	1	1	1	0	0	1	0	0	1	0	0	1	0	0	1	0	0	1	0	0	11	11	11	11.806	109	109	0	65.554	11	0	0	11	0	0	0	0	0	0	0	0
sp|P0AEC7|BARA_ECO57	sp|P0AEC7|BARA_ECO57	1	1	1	sp|P0AEC7|BARA_ECO57 Signal transduction histidine-protein kinase BarA OS=Escherichia coli O157:H7 OX=83334 GN=barA PE=3 SV=1	Signal transduction histidine-protein kinase BarA	barA	1	1	1	1	1	0	0	0	0	0	1	0	0	0	0	0	1	0	0	0	0	0	0.8	0.8	0.8	102.45	918	918	0	7.226	0.8	0	0	0	0	0	0	0	0	0	0	0
sp|P0AEY0|MALE_ECO57	sp|P0AEY0|MALE_ECO57	1	1	1	sp|P0AEY0|MALE_ECO57 Maltose/maltodextrin-binding periplasmic protein OS=Escherichia coli O157:H7 OX=83334 GN=malE PE=1 SV=1	Maltose/maltodextrin-binding periplasmic protein	malE	1	1	1	1	0	0	0	1	0	0	0	0	0	1	0	0	0	0	0	1	0	0	4.3	4.3	4.3	43.387	396	396	0	11.433	0	0	0	4.3	0	0	0	0	0	0	0	0
sp|P0AG46|RL17_ECO57	sp|P0AG46|RL17_ECO57	1	1	1	sp|P0AG46|RL17_ECO57 50S ribosomal protein L17 OS=Escherichia coli O157:H7 OX=83334 GN=rplQ PE=3 SV=1	50S ribosomal protein L17	rplQ	1	1	1	1	0	0	0	1	0	0	0	0	0	1	0	0	0	0	0	1	0	0	6.3	6.3	6.3	14.364	127	127	0	6.4575	0	0	0	6.3	0	0	0	0	0	0	0	0
sp|Q8X7Y9|YBHG_ECO57	sp|Q8X7Y9|YBHG_ECO57	1	1	1	sp|Q8X7Y9|YBHG_ECO57 UPF0194 membrane protein YbhG OS=Escherichia coli O157:H7 OX=83334 GN=ybhG PE=3 SV=1	UPF0194 membrane protein YbhG	ybhG	1	1	1	1	0	0	1	0	0	0	0	0	1	0	0	0	0	0	1	0	0	0	2.4	2.4	2.4	36.416	332	332	0	6.3898	0	0	2.4	0	0	0	0	0	0	0	0	0
sp|Q8X9J9|MURA_ECO57	sp|Q8X9J9|MURA_ECO57	1	1	1	sp|Q8X9J9|MURA_ECO57 UDP-N-acetylglucosamine 1-carboxyvinyltransferase OS=Escherichia coli O157:H7 OX=83334 GN=murA PE=3 SV=1	UDP-N-acetylglucosamine 1-carboxyvinyltransferase	murA	1	1	1	1	0	0	0	1	0	0	0	0	0	1	0	0	0	0	0	1	0	0	4.1	4.1	4.1	44.847	419	419	0	12.352	0	0	0	4.1	0	0	0	0	0	0	0	0
sp|Q8XA45|MLTF_ECO57	sp|Q8XA45|MLTF_ECO57	1	1	1	sp|Q8XA45|MLTF_ECO57 Membrane-bound lytic murein transglycosylase F OS=Escherichia coli O157:H7 OX=83334 GN=mltF PE=3 SV=2	Membrane-bound lytic murein transglycosylase F	mltF	1	1	1	1	1	0	0	1	0	0	1	0	0	1	0	0	1	0	0	1	0	0	1.4	1.4	1.4	58.316	518	518	0	6.4102	1.4	0	0	1.4	0	0	0	0	0	0	0	0
tr|A0A0H3JCU6|A0A0H3JCU6_ECO57	tr|A0A0H3JCU6|A0A0H3JCU6_ECO57	1	1	1	tr|A0A0H3JCU6|A0A0H3JCU6_ECO57 Uncharacterized protein OS=Escherichia coli O157:H7 OX=83334 GN=ybdM PE=4 SV=1	Uncharacterized protein	ybdM	1	1	1	1	0	0	0	1	1	0	0	0	0	1	1	0	0	0	0	1	1	0	4.2	4.2	4.2	24.149	212	212	0	6.54	0	0	0	4.2	4.2	0	0	0	0	0	0	0
tr|Q8X7N5|Q8X7N5_ECO57	tr|Q8X7N5|Q8X7N5_ECO57	1	1	1	tr|Q8X7N5|Q8X7N5_ECO57 Outer membrane phosphoporin protein E OS=Escherichia coli O157:H7 OX=83334 GN=phoE PE=3 SV=1	Outer membrane phosphoporin protein E	phoE	1	1	1	1	0	0	0	0	0	1	0	0	0	0	0	1	0	0	0	0	0	1	2.8	2.8	2.8	38.966	351	351	1	-2	0	0	0	0	0	2.8	0	0	0	0	0	0
tr|Q8X891|Q8X891_ECO57	tr|Q8X891|Q8X891_ECO57	1	1	1	tr|Q8X891|Q8X891_ECO57 Pectinesterase OS=Escherichia coli O157:H7 OX=83334 GN=ybhC PE=4 SV=1	Pectinesterase	ybhC	1	1	1	1	0	0	0	1	0	0	0	0	0	1	0	0	0	0	0	1	0	0	4.2	4.2	4.2	45.98	427	427	0	6.5884	0	0	0	4.2	0	0	0	0	0	0	0	0
tr|Q8XB69|Q8XB69_ECO57	tr|Q8XB69|Q8XB69_ECO57	1	1	1	tr|Q8XB69|Q8XB69_ECO57 Type I restriction-modification enzyme R subunit OS=Escherichia coli O157:H7 OX=83334 GN=hsdR PE=4 SV=1	Type I restriction-modification enzyme R subunit	hsdR	1	1	1	1	0	1	0	0	0	0	0	1	0	0	0	0	0	1	0	0	0	0	1.5	1.5	1.5	92.083	810	810	1	-2	0	1.5	0	0	0	0	0	0	0	0	0	0
tr|Q8XCN7|Q8XCN7_ECO57	tr|Q8XCN7|Q8XCN7_ECO57	1	1	1	tr|Q8XCN7|Q8XCN7_ECO57 Uncharacterized protein OS=Escherichia coli O157:H7 OX=83334 GN=yfcZ PE=3 SV=2	Uncharacterized protein	yfcZ	1	1	1	1	0	0	0	1	0	0	0	0	0	1	0	0	0	0	0	1	0	0	13.8	13.8	13.8	10.304	94	94	0	7.2355	0	0	0	13.8	0	0	0	0	0	0	0	0
tr|Q8XD60|Q8XD60_ECO57	tr|Q8XD60|Q8XD60_ECO57	1	1	1	tr|Q8XD60|Q8XD60_ECO57 Oxidoreductase OS=Escherichia coli O157:H7 OX=83334 GN=aegA PE=4 SV=2	Oxidoreductase	aegA	1	1	1	1	1	0	0	1	0	0	1	0	0	1	0	0	1	0	0	1	0	0	1.1	1.1	1.1	69.112	639	639	0	6.3819	1.1	0	0	1.1	0	0	0	0	0	0	0	0
tr|Q8XED9|Q8XED9_ECO57	tr|Q8XED9|Q8XED9_ECO57	1	1	1	tr|Q8XED9|Q8XED9_ECO57 Type IV secretion protein Rhs OS=Escherichia coli O157:H7 OX=83334 GN=rhsC PE=3 SV=1	Type IV secretion protein Rhs	rhsC	1	1	1	1	0	0	0	0	0	1	0	0	0	0	0	1	0	0	0	0	0	1	0.6	0.6	0.6	156.93	1404	1404	0	7.578	0	0	0	0	0	0.6	0	0	0	0	0	0
[truncated: 35 more columns]

## Sheet: mod spec peps SNCA
Sequence	Modifications	Mass	Mass Fractional Part	Protein Groups	Proteins	Unique (Groups)	Unique (Proteins)	Acetyl (Protein N-term)	Oxidation (M)	Phospho (STY)	Missed cleavages (Trypsin/P)	Missed cleavages (ProAla/Tryp)	Experiment alpha-Syn_PLK3-01	Experiment alpha-Syn_PLK3-02	Experiment alpha-Syn_PLK3-03	Experiment alpha-Syn-01	Experiment alpha-Syn-02	Experiment alpha-Syn-03	Retention time	Calibrated retention time	Charges	PEP	MS/MS scan number	Raw file	Score	Delta score	Reverse	Potential contaminant	Intensity	Intensity alpha-Syn_PLK3-01	Intensity alpha-Syn_PLK3-02	Intensity alpha-Syn_PLK3-03	Intensity alpha-Syn-01	Intensity alpha-Syn-02	Intensity alpha-Syn-03	id	Protein group IDs	Peptide ID	Evidence IDs	MS/MS IDs	Best MS/MS	Oxidation (M) site IDs	Phospho (STY) site IDs	MS/MS Count
AATGFVK	Unmodified	692.386	0.385725	102	sp|P37840|SYUA_HUMAN	yes	yes	0	0	0	0	2			6			7	30.694	30.694	1	5.9042e-18	38279	2025-05-16_SD_alpha-Syn-03	133.47	70.754			4763400000	0	0	2548500000	0	0	2214900000	7	102	7	16;17;18;19;20;21;22;23;24;25;26;27;28	21;22;23;24;25;26;27;28;29;30;31;32;33;34;35;36;37	33			14
AKEGVVAAAEK	Unmodified	1071.59	0.592424	102	sp|P37840|SYUA_HUMAN	yes	yes	0	0	0	1	5	6	2		6	4		13.368	13.368	1;2	0	7184	2025-05-16_SD_alpha-Syn_PLK-02	204.67	148.29			104690000000	11436000000	20943000000	0	48485000000	23828000000	0	36	102	35	101;102;103;104;105;106;107;108;109;110;111;112;113;114;115;116;117;118	119;120;121;122;123;124;125;126;127;128;129;130;131;132;133;134;135;136;137;138;139;140;141;142;143;144;145;146;147;148;149;150;151;152;153;154;155;156	130			37
AKEGVVAAAEKTK	Unmodified	1300.74	0.735065	102	sp|P37840|SYUA_HUMAN	yes	yes	0	0	0	2	6	2	1		2	1		12.419	12.419	2;3	0	5716	2025-05-16_SD_alpha-Syn-01	196.11	150.11			1291400000	550470000	354360000	0	279450000	107110000	0	37	102	36	119;120;121;122;123;124	157;158;159;160;161;162;163	162			7
ATGFVKK	Unmodified	749.444	0.443575	102	sp|P37840|SYUA_HUMAN	yes	yes	0	0	0	1	2			2				23.156	23.156	1;2	2.3966e-11	29275	2025-05-16_SD_alpha-Syn_PLK-03	126.2	60.067			3031500000	0	0	3031500000	0	0	0	63	102	62	214;215	278;279;280	279			2
DNEAYEMP	Oxidation (M)	983.354	0.354227	102	sp|P37840|SYUA_HUMAN	yes	yes	0	1	0	0	1			4			7	31.935	31.935	1;2	9.1476e-29	27349	2025-05-16_SD_alpha-Syn-03	94.262	72.997			192600000	0	0	106490000	0	0	86103000	99	102	98	307;308;309;310;311;312;313;314;315;316;317	385;386;387;388;389;390;391;392;393;394;395;396;397;398	398	17		14
DNEAYEMP	Unmodified	967.359	0.359312	102	sp|P37840|SYUA_HUMAN	yes	yes	0	0	0	0	1			1			1	41.526	41.526	1;2	2.0293e-17	37770	2025-05-16_SD_alpha-Syn-03	131.3	124.07			1179500000	0	0	413200000	0	0	766320000	100	102	98	318;319	399;400	400			2
DQLGKNEEGA	Unmodified	1059.48	0.483267	102	sp|P37840|SYUA_HUMAN	yes	yes	0	0	0	1	1						1	14.441	14.441	2	0.0010743	8740	2025-05-16_SD_alpha-Syn-03	113.66	72.776			23456000	0	0	0	0	0	23456000	102	102	100	321	402	402			1
DQLGKNEEGAP	Unmodified	1156.54	0.536031	102	sp|P37840|SYUA_HUMAN	yes	yes	0	0	0	1	2			2			5	20.97	20.97	1;2	8.6093e-86	14181	2025-05-16_SD_alpha-Syn-03	156.83	112.38			5357000000	0	0	2484900000	0	0	2872200000	103	102	101	322;323;324;325;326;327;328	403;404;405;406;407;408;409;410;411;412	408			10
DVFMKGLSK	Unmodified	1023.54	0.542302	102	sp|P37840|SYUA_HUMAN	yes	yes	0	0	0	1	1	1	1		1	1		37.564	37.564	2	1.0074e-38	21448	2025-05-16_SD_alpha-Syn_PLK-01	134.26	114.62			25510000	2763700	9836000	0	3021900	9888500	0	117	102	114	361;362;363;364	456;457;458;459	456			4
EGVLYVGSK	Unmodified	950.507	0.507297	102	sp|P37840|SYUA_HUMAN	yes	yes	0	0	0	0	0	9	11	10	10	8	11	28.269	28.269	1;2	2.6468e-270	23009	2025-05-16_SD_alpha-Syn-02	182.98	132.86			23731000000	81047000	5860400000	5409300000	69553000	5902200000	6409100000	137	102	134	418;419;420;421;422;423;424;425;426;427;428;429;430;431;432;433;434;435;436;437;438;439;440;441;442;443;444;445;446;447;448;449;450;451;452;453;454;455;456;457;458;459;460;461;462;463;464;465;466;467;468;469;470;471;472;473;474;475;476	538;539;540;541;542;543;544;545;546;547;548;549;550;551;552;553;554;555;556;557;558;559;560;561;562;563;564;565;566;567;568;569;570;571;572;573;574;575;576;577;578;579;580;581;582;583;584;585;586;587;588;589;590;591;592;593;594;595;596;597;598;599;600;601;602;603;604;605;606;607	584			69
EGVLYVGSKTK	Phospho (STY)	1259.62	0.616269	102	sp|P37840|SYUA_HUMAN	yes	yes	0	0	1	1	1				1	1		25.868	25.868	2	2.7947e-06	14071	2025-05-16_SD_alpha-Syn-01	103.43	91.585			8472300	0	0	0	2810000	5662300	0	138	102	135	477;478	608;609	608		2;8	2
EGVLYVGSKTKEGVVHGVATVAEK	Phospho (STY)	2536.29	0.293819	102	sp|P37840|SYUA_HUMAN	yes	yes	0	0	1	2	4		1		1	1		34.231	34.231	4	1.5144e-08	19401	2025-05-16_SD_alpha-Syn-01	47.757	44.295			37724000	0	23654000	0	3112400	10957000	0	139	102	136	479;480;481	610;611;612	611		2;8;9	3
EGVLYVGSKTKEGVVHGVATVAEK	Unmodified	2456.33	0.327489	102	sp|P37840|SYUA_HUMAN	yes	yes	0	0	0	2	4					1		30.274	30.274	4	5.2232e-07	25392	2025-05-16_SD_alpha-Syn-02	55.827	53.103			6512600	0	0	0	0	6512600	0	140	102	136	482	613	613			1
EGVVAAAEK	Unmodified	872.46	0.460347	102	sp|P37840|SYUA_HUMAN	yes	yes	0	0	0	0	3	4	9		4	6		14.413	14.413	1;2	0	6898	2025-05-16_SD_alpha-Syn-02	195.88	116.74			10872000000	45392000	5049600000	0	81463000	5695500000	0	141	102	137	483;484;485;486;487;488;489;490;491;492;493;494;495;496;497;498;499;500;501;502;503;504;505	614;615;616;617;618;619;620;621;622;623;624;625;626;627;628;629;630;631;632;633;634;635;636;637;638;639;640	635			27
EGVVAAAEKTK	Unmodified	1101.6	0.602988	102	sp|P37840|SYUA_HUMAN	yes	yes	0	0	0	1	4	1	1		1	1		13.192	13.192	2	3.1745e-32	6303	2025-05-16_SD_alpha-Syn_PLK-01	128.6	91.044			83739000	28248000	37552000	0	17939000	0	0	142	102	138	506;507;508;509	641;642;643;644;645	641			5
EGVVAAAEKTKQGVAEAAGK	Phospho (STY)	1992.99	0.988135	102	sp|P37840|SYUA_HUMAN	yes	yes	0	0	1	2	8	1	1					19.187	19.187	3	1.8624e-36	9974	2025-05-16_SD_alpha-Syn_PLK-01	110.6	95.287			47514000	23718000	23796000	0	0	0	0	143	102	139	510;511	646;647	646		10	2
EGVVAAAEKTKQGVAEAAGK	Unmodified	1913.02	0.0218047	102	sp|P37840|SYUA_HUMAN	yes	yes	0	0	0	2	8	3	1		1			23.711	23.711	3;4	3.0222e-05	10913	2025-05-16_SD_alpha-Syn_PLK-01	63.578	59.61			27723000	9964100	10602000	0	7157000	0	0	144	102	139	512;513;514;515;516	648;649;650;651;652	648			5
EGVVHGVA	Unmodified	766.397	0.397353	102	sp|P37840|SYUA_HUMAN	yes	yes	0	0	0	0	0			3			2	18.201	18.201	1;2	1.2561e-17	13371	2025-05-16_SD_alpha-Syn_PLK-03	130.84	89.916			4015300000	0	0	2258700000	0	0	1756600000	145	102	140	517;518;519;520;521	653;654;655;656;657	654			4
EGVVHGVATVA	Unmodified	1037.55	0.550559	102	sp|P37840|SYUA_HUMAN	yes	yes	0	0	0	0	1			1			1	26.449	26.449	2	0.00083647	21135	2025-05-16_SD_alpha-Syn_PLK-03	108.46	60.612			78297000	0	0	38410000	0	0	39888000	146	102	141	522;523	658;659	658			2
EGVVHGVATVAEK	Phospho (STY)	1374.65	0.654445	102	sp|P37840|SYUA_HUMAN	yes	yes	0	0	1	0	2	2	1		1			25.665	25.665	2;3	1.1121e-76	20471	2025-05-16_SD_alpha-Syn_PLK-02	141.54	105.12			8822000	4339400	3720600	0	761970	0	0	148	102	142	654;655;656;657	875;876;877;878;879	877		9	5
EGVVHGVATVAEK	Unmodified	1294.69	0.688115	102	sp|P37840|SYUA_HUMAN	yes	yes	0	0	0	0	2	29	15	10	43	15	18	27.119	27.119	1;2;3	0	8406	2025-05-16_SD_alpha-Syn_PLK-01	302.33	249.75			77272000000	7942200000	16366000000	9335000000	8935600000	20852000000	13841000000	147	102	142	524;525;526;527;528;529;530;531;532;533;534;535;536;537;538;539;540;541;542;543;544;545;546;547;548;549;550;551;552;553;554;555;556;557;558;559;560;561;562;563;564;565;566;567;568;569;570;571;572;573;574;575;576;577;578;579;580;581;582;583;584;585;586;587;588;589;590;591;592;593;594;595;596;597;598;599;600;601;602;603;604;605;606;607;608;609;610;611;612;613;614;615;616;617;618;619;620;621;622;623…	660;661;662;663;664;665;666;667;668;669;670;671;672;673;674;675;676;677;678;679;680;681;682;683;684;685;686;687;688;689;690;691;692;693;694;695;696;697;698;699;700;701;702;703;704;705;706;707;708;709;710;711;712;713;714;715;716;717;718;719;720;721;722;723;724;725;726;727;728;729;730;731;732;733;734;735;736;737;738;739;740;741;742;743;744;745;746;747;748;749;750;751;752;753;754;755;756;757;758;759…	661			209
EGVVHGVATVAEKTK	Unmodified	1523.83	0.830756	102	sp|P37840|SYUA_HUMAN	yes	yes	0	0	0	1	3	2	2		2	3		19.111	19.111	2;3;4	0	13597	2025-05-16_SD_alpha-Syn-02	232.78	168.98			1925000000	462420000	552480000	0	243220000	666910000	0	149	102	143	658;659;660;661;662;663;664;665;666	880;881;882;883;884;885;886;887;888;889;890;891	891			12
EGVVHGVATVAEKTKEQVTNVGGAVVTGVTAVAQK	Unmodified	3432.86	0.857646	102	sp|P37840|SYUA_HUMAN	yes	yes	0	0	0	2	7	11	5		9	3		49.753	49.753	3;4;5;6	0	29327	2025-05-16_SD_alpha-Syn_PLK-01	192.1	190.57			2195700000	631530000	986030000	0	125310000	452860000	0	150	102	144	667;668;669;670;671;672;673;674;675;676;677;678;679;680;681;682;683;684;685;686;687;688;689;690;691;692;693;694	892;893;894;895;896;897;898;899;900;901;902;903;904;905;906;907;908;909;910;911;912;913;914;915;916;917;918;919;920;921;922;923;924;925;926;927;928;929;930;931;932;933;934;935;936;937;938;939;940;941;942;943;944;945	904			52
EQVTNVGGAVVTGVTA	Unmodified	1500.78	0.778386	102	sp|P37840|SYUA_HUMAN	yes	yes	0	0	0	0	1			3			2	44.464	44.464	1;2;3	4.6539e-35	41942	2025-05-16_SD_alpha-Syn_PLK-03	126.19	112.6			6082500000	0	0	3550300000	0	0	2532200000	159	102	153	724;725;726;727;728	988;989;990;991;992;993;994;995;996;997	989			10
EQVTNVGGAVVTGVTAVAQK	Unmodified	1927.04	0.0374547	102	sp|P37840|SYUA_HUMAN	yes	yes	0	0	0	0	3	38	20		28	22		50.757	50.757	1;2;3	0	26856	2025-05-16_SD_alpha-Syn_PLK-01	212.87	202.23			110310000000	147680000	27949000000	0	17744000000	64467000000	0	160	102	154	729;730;731;732;733;734;735;736;737;738;739;740;741;742;743;744;745;746;747;748;749;750;751;752;753;754;755;756;757;758;759;760;761;762;763;764;765;766;767;768;769;770;771;772;773;774;775;776;777;778;779;780;781;782;783;784;785;786;787;788;789;790;791;792;793;794;795;796;797;798;799;800;801;802;803;804;805;806;807;808;809;810;811;812;813;814;815;816;817;818;819;820;821;822;823;824;825;826;827;828…	998;999;1000;1001;1002;1003;1004;1005;1006;1007;1008;1009;1010;1011;1012;1013;1014;1015;1016;1017;1018;1019;1020;1021;1022;1023;1024;1025;1026;1027;1028;1029;1030;1031;1032;1033;1034;1035;1036;1037;1038;1039;1040;1041;1042;1043;1044;1045;1046;1047;1048;1049;1050;1051;1052;1053;1054;1055;1056;1057;1058;1059;1060;1061;1062;1063;1064;1065;1066;1067;1068;1069;1070;1071;1072;1073;1074;1075;1076;1077;1…	1002			154
EQVTNVGGAVVTGVTAVAQKTVEGAGSIAAATGFVK	Phospho (STY)	3466.77	0.770879	102	sp|P37840|SYUA_HUMAN	yes	yes	0	0	1	1	8		1					57.534	57.534	4	1.9547e-24	57180	2025-05-16_SD_alpha-Syn_PLK-02	46.898	44.95			7110300	0	7110300	0	0	0	0	161	102	155	837	1161	1161		3;11;12;13;14;15	1
GLSKAKEGVVAAAEK	Unmodified	1456.82	0.824943	102	sp|P37840|SYUA_HUMAN	yes	yes	0	0	0	2	6	2			2	1		14.308	14.308	3	6.7472e-05	7236	2025-05-16_SD_alpha-Syn_PLK-01	79.652	73.62			18744000	6092400	0	0	4658800	7992600	0	231	102	225	1079;1080;1081;1082;1083	1451;1452;1453;1454;1455;1456	1452			6
QEGILEDMP	Oxidation (M)	1046.46	0.459026	102	sp|P37840|SYUA_HUMAN	yes	yes	0	1	0	0	0			16			18	45.878	45.878	1;2	0	39513	2025-05-16_SD_alpha-Syn-03	202.45	135.46			5957100000	0	0	3397100000	0	0	2560000000	441	102	426	1647;1648;1649;1650;1651;1652;1653;1654;1655;1656;1657;1658;1659;1660;1661;1662;1663;1664;1665;1666;1667;1668;1669;1670;1671;1672;1673;1674;1675;1676;1677;1678;1679;1680	2154;2155;2156;2157;2158;2159;2160;2161;2162;2163;2164;2165;2166;2167;2168;2169;2170;2171;2172;2173;2174;2175;2176;2177;2178;2179;2180;2181;2182;2183;2184;2185;2186;2187;2188;2189;2190;2191;2192;2193;2194;2195;2196;2197;2198;2199;2200;2201;2202;2203;2204;2205;2206;2207;2208;2209;2210;2211;2212;2213;2214;2215;2216;2217;2218;2219;2220;2221;2222;2223;2224;2225;2226;2227;2228;2229;2230;2231;2232;2233…	2207	18		91
QEGILEDMP	Unmodified	1030.46	0.464112	102	sp|P37840|SYUA_HUMAN	yes	yes	0	0	0	0	0						1	53.127	53.127	1	1.8668e-98	51308	2025-05-16_SD_alpha-Syn-03	161.9	130.61			25108000	0	0	0	0	0	25108000	442	102	426	1681	2245;2246;2247	2245			3
QEGILEDMPVDP	Oxidation (M)	1357.61	0.607147	102	sp|P37840|SYUA_HUMAN	yes	yes	0	1	0	0	1			1			1	44.757	44.757	2	5.727e-06	41364	2025-05-16_SD_alpha-Syn_PLK-03	103.55	89.744			783950000	0	0	628970000	0	0	154980000	443	102	427	1682;1683	2248;2249;2250;2251	2248	18		4
QEGILEDMPVDP	Unmodified	1341.61	0.612232	102	sp|P37840|SYUA_HUMAN	yes	yes	0	0	0	0	1			1			2	56.561	56.561	1;2	1.2201e-60	54418	2025-05-16_SD_alpha-Syn-03	147.95	123.02			804370000	0	0	143310000	0	0	661060000	444	102	427	1684;1685;1686	2252;2253;2254;2255	2254			4
QEGILEDMPVDPDNEA	Oxidation (M)	1786.76	0.756724	102	sp|P37840|SYUA_HUMAN	yes	yes	0	1	0	0	2			1			1	45.167	45.167	2	5.3077e-25	41902	2025-05-16_SD_alpha-Syn_PLK-03	118.37	112.4			215440000	0	0	104700000	0	0	110740000	445	102	428	1687;1688	2256;2257;2258	2256	18		3
QEGILEDMPVDPDNEA	Unmodified	1770.76	0.76181	102	sp|P37840|SYUA_HUMAN	yes	yes	0	0	0	0	2						1	56.002	56.002	2	1.1413e-10	54008	2025-05-16_SD_alpha-Syn-03	75.849	65.962			12669000	0	0	0	0	0	12669000	446	102	428	1689	2259	2259			0
QGVAEAAGK	Unmodified	829.429	0.429381	102	sp|P37840|SYUA_HUMAN	yes	yes	0	0	0	0	3	5	4		7	3		13.656	13.656	1;2	0	7174	2025-05-16_SD_alpha-Syn_PLK-02	207.29	92.505			250340000000	76979000000	81362000000	0	69331000000	22669000000	0	452	102	434	1700;1701;1702;1703;1704;1705;1706;1707;1708;1709;1710;1711;1712;1713;1714;1715;1716;1717;1718	2270;2271;2272;2273;2274;2275;2276;2277;2278;2279;2280;2281;2282;2283;2284;2285;2286;2287;2288;2289;2290;2291;2292;2293;2294;2295;2296;2297;2298;2299;2300;2301;2302;2303;2304;2305;2306	2280			37
QGVAEAAGKTKEGVLYVGSK	Phospho (STY)	2071.04	0.0350853	102	sp|P37840|SYUA_HUMAN	yes	yes	0	0	1	2	5		1			1		25.813	25.813	3	2.2845e-08	20680	2025-05-16_SD_alpha-Syn-02	42.106	38.387			30169000	0	22113000	0	0	8056000	0	454	102	435	1728;1729	2319;2320	2320		2;16	2
QGVAEAAGKTKEGVLYVGSK	Unmodified	1991.07	0.0687549	102	sp|P37840|SYUA_HUMAN	yes	yes	0	0	0	2	5	2	2		2	3		24.221	24.221	3;4	4.7348e-28	18962	2025-05-16_SD_alpha-Syn_PLK-02	96.505	92.785			228350000	45670000	86615000	0	35057000	61004000	0	453	102	435	1719;1720;1721;1722;1723;1724;1725;1726;1727	2307;2308;2309;2310;2311;2312;2313;2314;2315;2316;2317;2318	2309			12
SEEGYQDYEP	Phospho (STY)	1295.42	0.423108	102	sp|P37840|SYUA_HUMAN	yes	yes	0	0	1	0	0			2				46.3	46.3	1;2	0.0011547	43840	2025-05-16_SD_alpha-Syn_PLK-03	73.067	59.258			379730000	0	0	379730000	0	0	0	494	102	472	1837;1838	2458;2459;2460;2461;2462	2459		4	5
SEEGYQDYEP	Unmodified	1215.46	0.456778	102	sp|P37840|SYUA_HUMAN	yes	yes	0	0	0	0	0			1			2	34.891	34.891	1;2	8.0675e-82	30916	2025-05-16_SD_alpha-Syn-03	157.58	95.471			4857700000	0	0	1564200000	0	0	3293400000	493	102	472	1834;1835;1836	2453;2454;2455;2456;2457	2456			5
SEEGYQDYEPEA	Phospho (STY)	1495.5	0.502815	102	sp|P37840|SYUA_HUMAN	yes	yes	0	0	1	0	1			4				51.411	51.411	1;2	1.5674e-09	49808	2025-05-16_SD_alpha-Syn_PLK-03	115.29	108.7			6165000	0	0	6165000	0	0	0	496	102	473	1843;1844;1845;1846	2473;2474;2475;2476;2477;2478	2474		4	6
SEEGYQDYEPEA	Unmodified	1415.54	0.536484	102	sp|P37840|SYUA_HUMAN	yes	yes	0	0	0	0	1			2			2	37.401	37.401	1;2	1.392e-91	31380	2025-05-16_SD_alpha-Syn-03	155.07	140.79			8216600000	0	0	22772000	0	0	8193800000	495	102	473	1839;1840;1841;1842	2463;2464;2465;2466;2467;2468;2469;2470;2471;2472	2465			10
TGFVKKDQLGK	Unmodified	1219.69	0.692472	102	sp|P37840|SYUA_HUMAN	yes	yes	0	0	0	2	2			1			2	13.575	13.575	3	0.0010969	8822	2025-05-16_SD_alpha-Syn-03	87.184	74.568			50750000	0	0	20425000	0	0	30325000	550	102	524	2015;2016;2017	2711;2712;2713;2714;2715	2715			5
TKEGVLYVGSK	Unmodified	1179.65	0.649938	102	sp|P37840|SYUA_HUMAN	yes	yes	0	0	0	1	1	47	12	19	49	11	27	30.252	30.252	1;2;3	0	10094	2025-05-16_SD_alpha-Syn_PLK-01	153.34	96.682			87451000000	199010000	18585000000	16135000000	10167000000	21969000000	20396000000	556	102	530	2034;2035;2036;2037;2038;2039;2040;2041;2042;2043;2044;2045;2046;2047;2048;2049;2050;2051;2052;2053;2054;2055;2056;2057;2058;2059;2060;2061;2062;2063;2064;2065;2066;2067;2068;2069;2070;2071;2072;2073;2074;2075;2076;2077;2078;2079;2080;2081;2082;2083;2084;2085;2086;2087;2088;2089;2090;2091;2092;2093;2094;2095;2096;2097;2098;2099;2100;2101;2102;2103;2104;2105;2106;2107;2108;2109;2110;2111;2112;2113…	2738;2739;2740;2741;2742;2743;2744;2745;2746;2747;2748;2749;2750;2751;2752;2753;2754;2755;2756;2757;2758;2759;2760;2761;2762;2763;2764;2765;2766;2767;2768;2769;2770;2771;2772;2773;2774;2775;2776;2777;2778;2779;2780;2781;2782;2783;2784;2785;2786;2787;2788;2789;2790;2791;2792;2793;2794;2795;2796;2797;2798;2799;2800;2801;2802;2803;2804;2805;2806;2807;2808;2809;2810;2811;2812;2813;2814;2815;2816;2817…	2773			249
TKEGVLYVGSKTK	Phospho (STY)	1488.76	0.75891	102	sp|P37840|SYUA_HUMAN	yes	yes	0	0	1	2	2		1			1		18.526	18.526	3	0.00068434	12927	2025-05-16_SD_alpha-Syn-02	73.093	70.384			15938000	0	8868200	0	0	7069600	0	558	102	531	2205;2206	2994;2995;2996	2996		2;8;16	3
TKEGVLYVGSKTK	Unmodified	1408.79	0.79258	102	sp|P37840|SYUA_HUMAN	yes	yes	0	0	0	2	2	1	1	1	1		2	14.176	14.176	3	0.00061195	8808	2025-05-16_SD_alpha-Syn_PLK-03	71.513	57.256			51137000	6733000	5822900	11596000	7324700	0	19661000	557	102	531	2199;2200;2201;2202;2203;2204	2988;2989;2990;2991;2992;2993	2990			5
TKEGVVHGVA	Unmodified	995.54	0.539994	102	sp|P37840|SYUA_HUMAN	yes	yes	0	0	0	1	1			4			3	12.468	12.468	1;2	8.5861e-99	6981	2025-05-16_SD_alpha-Syn_PLK-03	161.86	147.08			49517000000	0	0	25242000000	0	0	24275000000	559	102	532	2207;2208;2209;2210;2211;2212;2213	2997;2998;2999;3000;3001;3002;3003;3004;3005;3006;3007	2999			11
TKEGVVHGVATVA	Unmodified	1266.69	0.6932	102	sp|P37840|SYUA_HUMAN	yes	yes	0	0	0	1	2			1			2	19.635	19.635	2;3	0.0021718	13996	2025-05-16_SD_alpha-Syn-03	57.136	53.491			19484000	0	0	0	0	0	19484000	560	102	533	2214;2215;2216	3008;3009;3010	3010			2
TKEGVVHGVATVAEK	Phospho (STY)	1603.8	0.797087	102	sp|P37840|SYUA_HUMAN	yes	yes	0	0	1	1	3	1	2					20.158	20.158	3	6.4305e-06	15270	2025-05-16_SD_alpha-Syn_PLK-02	81.016	64.264			24070000	0	24070000	0	0	0	0	562	102	534	2549;2550;2551	3524;3525;3526	3526		8;9	3
TKEGVVHGVATVAEK	Unmodified	1523.83	0.830756	102	sp|P37840|SYUA_HUMAN	yes	yes	0	0	0	1	3	105	66		98	63		38.347	38.347	1;2;3;4	0	8505	2025-05-16_SD_alpha-Syn_PLK-01	233.97	161.31			44871000000	2715900000	19378000000	0	16381000000	6396700000	0	561	102	534	2217;2218;2219;2220;2221;2222;2223;2224;2225;2226;2227;2228;2229;2230;2231;2232;2233;2234;2235;2236;2237;2238;2239;2240;2241;2242;2243;2244;2245;2246;2247;2248;2249;2250;2251;2252;2253;2254;2255;2256;2257;2258;2259;2260;2261;2262;2263;2264;2265;2266;2267;2268;2269;2270;2271;2272;2273;2274;2275;2276;2277;2278;2279;2280;2281;2282;2283;2284;2285;2286;2287;2288;2289;2290;2291;2292;2293;2294;2295;2296…	3011;3012;3013;3014;3015;3016;3017;3018;3019;3020;3021;3022;3023;3024;3025;3026;3027;3028;3029;3030;3031;3032;3033;3034;3035;3036;3037;3038;3039;3040;3041;3042;3043;3044;3045;3046;3047;3048;3049;3050;3051;3052;3053;3054;3055;3056;3057;3058;3059;3060;3061;3062;3063;3064;3065;3066;3067;3068;3069;3070;3071;3072;3073;3074;3075;3076;3077;3078;3079;3080;3081;3082;3083;3084;3085;3086;3087;3088;3089;3090…	3013			513
TKEGVVHGVATVAEKTK	Unmodified	1752.97	0.973398	102	sp|P37840|SYUA_HUMAN	yes	yes	0	0	0	2	4	2	2		1	2		16.816	16.816	3	2.7926e-112	8867	2025-05-16_SD_alpha-Syn_PLK-01	147.49	95.443			50085000	8677100	16463000	0	7686600	17258000	0	563	102	535	2552;2553;2554;2555;2556;2557;2558	3527;3528;3529;3530;3531;3532;3533;3534;3535;3536;3537;3538	3527			11
TKEQVTNVGGA	Unmodified	1102.56	0.561852	102	sp|P37840|SYUA_HUMAN	yes	yes	0	0	0	1	1						1	14.991	14.991	2	3.567e-55	9286	2025-05-16_SD_alpha-Syn-03	148.5	125.76			3560800000	0	0	0	0	0	3560800000	564	102	536	2559	3539;3540	3540			2
TKEQVTNVGGAVVTGVTA	Phospho (STY)	1809.89	0.887358	102	sp|P37840|SYUA_HUMAN	yes	yes	0	0	1	1	2			1				41.668	41.668	2	4.7464e-74	37904	2025-05-16_SD_alpha-Syn_PLK-03	125.73	114.04			12057000	0	0	12057000	0	0	0	566	102	537	2588	3581	3581		11;12;13	0
TKEQVTNVGGAVVTGVTA	Unmodified	1729.92	0.921028	102	sp|P37840|SYUA_HUMAN	yes	yes	0	0	0	1	2			12			16	43.509	43.509	1;2;3	0	33461	2025-05-16_SD_alpha-Syn-03	190.37	172.1			6665000000	0	0	3754300000	0	0	2910700000	565	102	537	2560;2561;2562;2563;2564;2565;2566;2567;2568;2569;2570;2571;2572;2573;2574;2575;2576;2577;2578;2579;2580;2581;2582;2583;2584;2585;2586;2587	3541;3542;3543;3544;3545;3546;3547;3548;3549;3550;3551;3552;3553;3554;3555;3556;3557;3558;3559;3560;3561;3562;3563;3564;3565;3566;3567;3568;3569;3570;3571;3572;3573;3574;3575;3576;3577;3578;3579;3580	3574			40
TKEQVTNVGGAVVTGVTAVAQK	Phospho (STY)	2236.15	0.146427	102	sp|P37840|SYUA_HUMAN	yes	yes	0	0	1	1	4	4	2		3	2		39.348	39.348	3;4	2.8537e-16	24705	2025-05-16_SD_alpha-Syn_PLK-01	87.439	87.439			564370000	171080000	330240000	0	39470000	23586000	0	568	102	538	2689;2690;2691;2692;2693;2694;2695;2696;2697;2698;2699	3775;3776;3777;3778;3779;3780;3781;3782;3783;3784;3785;3786;3787;3788;3789;3790	3779		11;12;13	16
TKEQVTNVGGAVVTGVTAVAQK	Unmodified	2156.18	0.180096	102	sp|P37840|SYUA_HUMAN	yes	yes	0	0	0	1	4	29	28		25	18		43.499	43.499	1;2;3;4	0	22275	2025-05-16_SD_alpha-Syn_PLK-01	205.68	184.72			30609000000	823770000	28507000000	0	782460000	495790000	0	567	102	538	2589;2590;2591;2592;2593;2594;2595;2596;2597;2598;2599;2600;2601;2602;2603;2604;2605;2606;2607;2608;2609;2610;2611;2612;2613;2614;2615;2616;2617;2618;2619;2620;2621;2622;2623;2624;2625;2626;2627;2628;2629;2630;2631;2632;2633;2634;2635;2636;2637;2638;2639;2640;2641;2642;2643;2644;2645;2646;2647;2648;2649;2650;2651;2652;2653;2654;2655;2656;2657;2658;2659;2660;2661;2662;2663;2664;2665;2666;2667;2668…	3582;3583;3584;3585;3586;3587;3588;3589;3590;3591;3592;3593;3594;3595;3596;3597;3598;3599;3600;3601;3602;3603;3604;3605;3606;3607;3608;3609;3610;3611;3612;3613;3614;3615;3616;3617;3618;3619;3620;3621;3622;3623;3624;3625;3626;3627;3628;3629;3630;3631;3632;3633;3634;3635;3636;3637;3638;3639;3640;3641;3642;3643;3644;3645;3646;3647;3648;3649;3650;3651;3652;3653;3654;3655;3656;3657;3658;3659;3660;3661…	3585			183
TKEQVTNVGGAVVTGVTAVAQKTVEGAGSIAAATGFVK	Phospho (STY)	3695.91	0.91352	102	sp|P37840|SYUA_HUMAN	yes	yes	0	0	1	2	9	1			1			51.303	51.303	4	5.9024e-34	31006	2025-05-16_SD_alpha-Syn_PLK-01	62.603	60.941			21963000	17095000	0	0	4867800	0	0	569	102	539	2700;2701	3791;3792	3791		3;11;12;13;14;15	2
TKQGVAEAAGK	Unmodified	1058.57	0.572023	102	sp|P37840|SYUA_HUMAN	yes	yes	0	0	0	1	4	3	2		5	3		12.802	12.802	1;2	0	5828	2025-05-16_SD_alpha-Syn_PLK-01	203.8	68.799			133390000000	25675000000	62944000000	0	28044000000	16723000000	0	570	102	540	2702;2703;2704;2705;2706;2707;2708;2709;2710;2711;2712;2713;2714	3793;3794;3795;3796;3797;3798;3799;3800;3801;3802;3803;3804;3805;3806;3807;3808;3809;3810;3811;3812	3793			20
TVEGAGSIA	Unmodified	803.403	0.402498	102	sp|P37840|SYUA_HUMAN	yes	yes	0	0	0	0	1						2	28.008	28.008	1;2	6.4518e-08	21097	2025-05-16_SD_alpha-Syn-03	101.21	48.528			1510300000	0	0	0	0	0	1510300000	589	102	559	2769;2770	3875;3876	3876			1
TVEGAGSIAA	Unmodified	874.44	0.439611	102	sp|P37840|SYUA_HUMAN	yes	yes	0	0	0	0	2			1			3	27.747	27.747	1;2	0.0017006	22846	2025-05-16_SD_alpha-Syn_PLK-03	99.375	70.952			1157300000	0	0	495130000	0	0	662180000	590	102	560	2771;2772;2773;2774	3877;3878;3879;3880	3877			4
TVEGAGSIAAATGFVK	Phospho (STY)	1557.74	0.743989	102	sp|P37840|SYUA_HUMAN	yes	yes	0	0	1	0	4	1	3					46.613	46.613	2	8.3746e-24	40274	2025-05-16_SD_alpha-Syn_PLK-02	106.19	84.957			28669000	1941900	26727000	0	0	0	0	592	102	561	2896;2897;2898;2899	4096;4097;4098;4099	4097		3;14;15	4
TVEGAGSIAAATGFVK	Unmodified	1477.78	0.777658	102	sp|P37840|SYUA_HUMAN	yes	yes	0	0	0	0	4	32	35		26	28		48.606	48.606	1;2;3	0	34436	2025-05-16_SD_alpha-Syn-01	188.91	152.21			8380600000	89199000	4615900000	0	129310000	3546200000	0	591	102	561	2775;2776;2777;2778;2779;2780;2781;2782;2783;2784;2785;2786;2787;2788;2789;2790;2791;2792;2793;2794;2795;2796;2797;2798;2799;2800;2801;2802;2803;2804;2805;2806;2807;2808;2809;2810;2811;2812;2813;2814;2815;2816;2817;2818;2819;2820;2821;2822;2823;2824;2825;2826;2827;2828;2829;2830;2831;2832;2833;2834;2835;2836;2837;2838;2839;2840;2841;2842;2843;2844;2845;2846;2847;2848;2849;2850;2851;2852;2853;2854…	3881;3882;3883;3884;3885;3886;3887;3888;3889;3890;3891;3892;3893;3894;3895;3896;3897;3898;3899;3900;3901;3902;3903;3904;3905;3906;3907;3908;3909;3910;3911;3912;3913;3914;3915;3916;3917;3918;3919;3920;3921;3922;3923;3924;3925;3926;3927;3928;3929;3930;3931;3932;3933;3934;3935;3936;3937;3938;3939;3940;3941;3942;3943;3944;3945;3946;3947;3948;3949;3950;3951;3952;3953;3954;3955;3956;3957;3958;3959;3960…	4003			209
TVEGAGSIAAATGFVKK	Phospho (STY)	1685.84	0.838952	102	sp|P37840|SYUA_HUMAN	yes	yes	0	0	1	1	5		1					38.782	38.782	3	0.0009194	34310	2025-05-16_SD_alpha-Syn_PLK-02	57.496	43.241			23142000	0	23142000	0	0	0	0	594	102	562	3057	4384	4384		3;14;15	1
TVEGAGSIAAATGFVKK	Unmodified	1605.87	0.872621	102	sp|P37840|SYUA_HUMAN	yes	yes	0	0	0	1	5	48	32		53	24		44.558	44.558	2;3	0	20590	2025-05-16_SD_alpha-Syn_PLK-01	234.41	209.56			2986400000	598440000	1140400000	0	577690000	669830000	0	593	102	562	2900;2901;2902;2903;2904;2905;2906;2907;2908;2909;2910;2911;2912;2913;2914;2915;2916;2917;2918;2919;2920;2921;2922;2923;2924;2925;2926;2927;2928;2929;2930;2931;2932;2933;2934;2935;2936;2937;2938;2939;2940;2941;2942;2943;2944;2945;2946;2947;2948;2949;2950;2951;2952;2953;2954;2955;2956;2957;2958;2959;2960;2961;2962;2963;2964;2965;2966;2967;2968;2969;2970;2971;2972;2973;2974;2975;2976;2977;2978;2979…	4100;4101;4102;4103;4104;4105;4106;4107;4108;4109;4110;4111;4112;4113;4114;4115;4116;4117;4118;4119;4120;4121;4122;4123;4124;4125;4126;4127;4128;4129;4130;4131;4132;4133;4134;4135;4136;4137;4138;4139;4140;4141;4142;4143;4144;4145;4146;4147;4148;4149;4150;4151;4152;4153;4154;4155;4156;4157;4158;4159;4160;4161;4162;4163;4164;4165;4166;4167;4168;4169;4170;4171;4172;4173;4174;4175;4176;4177;4178;4179…	4110			266
TVEGAGSIAAATGFVKKDQLGK	Unmodified	2147.16	0.158632	102	sp|P37840|SYUA_HUMAN	yes	yes	0	0	0	2	6	3	2		2	3		34.484	34.484	2;3;4	0	19451	2025-05-16_SD_alpha-Syn_PLK-01	190.44	162.23			3494900000	734160000	1267100000	0	626220000	867400000	0	595	102	563	3058;3059;3060;3061;3062;3063;3064;3065;3066;3067	4385;4386;4387;4388;4389;4390;4391;4392;4393;4394;4395;4396;4397;4398;4399;4400;4401;4402;4403;4404;4405;4406;4407	4387			23
VDPDNEA	Unmodified	758.308	0.308263	102	sp|P37840|SYUA_HUMAN	yes	yes	0	0	0	0	1						1	15.414	15.414	2	0.012738	9751	2025-05-16_SD_alpha-Syn-03	53.71	6.6644			12963000	0	0	0	0	0	12963000	614	102	581	3112	4471	4471			0
VVTGVTA	Unmodified	645.37	0.369741	102	sp|P37840|SYUA_HUMAN	yes	yes	0	0	0	0	0			1				44.476	44.476	1	0.017666	41163	2025-05-16_SD_alpha-Syn_PLK-03	98.807	29.375			9578700	0	0	9578700	0	0	0	660	102	625	3219	4594	4594			1
VVTGVTAVAQK	Unmodified	1071.63	0.628809	102	sp|P37840|SYUA_HUMAN	yes	yes	0	0	0	0	2			6			5	36.732	36.732	1;2	0	33150	2025-05-16_SD_alpha-Syn_PLK-03	215.93	164.08			430170000	0	0	178860000	0	0	251310000	661	102	626	3220;3221;3222;3223;3224;3225;3226;3227;3228;3229;3230	4595;4596;4597;4598;4599;4600;4601;4602;4603;4604;4605;4606;4607;4608	4597			14

## Sheet: pSTY sites
Proteins	Positions within proteins	Leading proteins	Protein	Fasta headers	Protein names	Gene names	Localization prob	Score diff	PEP	Score	Delta score	Score for localization	Localization prob alpha-Syn_PLK3-01	Score diff alpha-Syn_PLK3-01	PEP alpha-Syn_PLK3-01	Score alpha-Syn_PLK3-01	Localization prob alpha-Syn_PLK3-02	Score diff alpha-Syn_PLK3-02	PEP alpha-Syn_PLK3-02	Score alpha-Syn_PLK3-02	Localization prob alpha-Syn_PLK3-03	Score diff alpha-Syn_PLK3-03	PEP alpha-Syn_PLK3-03	Score alpha-Syn_PLK3-03	Localization prob alpha-Syn-01	Score diff alpha-Syn-01	PEP alpha-Syn-01	Score alpha-Syn-01	Localization prob alpha-Syn-02	Score diff alpha-Syn-02	PEP alpha-Syn-02	Score alpha-Syn-02	Localization prob alpha-Syn-03	Score diff alpha-Syn-03	PEP alpha-Syn-03	Score alpha-Syn-03	Diagnostic peak	Number of Phospho (STY)	Amino acid	Sequence window	Modification window	Peptide window coverage	Phospho (STY) Probabilities	Phospho (STY) Score diffs	Position in peptide	Charge	Mass error [ppm]	Intensity	Intensity___1
sp|P0A7Z2|RPIA_ECO57	108	sp|P0A7Z2|RPIA_ECO57	sp|P0A7Z2|RPIA_ECO57	sp|P0A7Z2|RPIA_ECO57 Ribose-5-phosphate isomerase A OS=Escherichia coli O157:H7 OX=83334 GN=rpiA PE=3 SV=1	Ribose-5-phosphate isomerase A	rpiA	1	53.5543	0.00318625	81.784	52.446	53.554																	1	81.7839	0.00675956	81.784	1	53.5543	0.00318625	53.554		1	S	IKGGGAALTREKIIASVAEKFICIADASKQV	X;X;X;X;X;X;X;X;X;X;X;X;X;X;X;Phospho (STY);X;X;X;X;X;X;X;X;X;X;X;X;X;X;X	XXXXXXXXXXXXPPPPPPPPXXXXXXXXXXX	IIAS(1)VAEK	IIAS(54)VAEK	4	2	-1.9337	1710600	1710600
sp|P0A997|GLPC_ECO57	283	sp|P0A997|GLPC_ECO57	sp|P0A997|GLPC_ECO57	sp|P0A997|GLPC_ECO57 Anaerobic glycerol-3-phosphate dehydrogenase subunit C OS=Escherichia coli O157:H7 OX=83334 GN=glpC PE=3 SV=1	Anaerobic glycerol-3-phosphate dehydrogenase subunit C	glpC	1	41.0291	0.00579399	41.029	24.696	41.029																	1	40.0015	0.00579399	40.002	1	41.0291	0.0158622	41.029		1	T	ELATRWLWRKLDEGKTLPLKPLPLKVVYHTP	X;X;X;X;X;X;X;X;X;X;X;X;X;X;X;Phospho (STY);X;X;X;X;X;X;X;X;X;X;X;X;X;X;X	XXXXXXXXXXPPPPPPPPPPXXXXXXXXXXX	LDEGKT(1)LPLK	LDEGKT(41)LPLK	6	2	1.3189	0	0
sp|P0AB72|ALF_ECO57	67	sp|P0AB72|ALF_ECO57	sp|P0AB72|ALF_ECO57	sp|P0AB72|ALF_ECO57 Fructose-bisphosphate aldolase class 2 OS=Escherichia coli O157:H7 OX=83334 GN=fbaA PE=3 SV=2	Fructose-bisphosphate aldolase class 2	fbaA	0.987177	18.8642	1.60272e-08	56.681	48.08	56.681	0.987177	18.8642	0.000359131	56.681	0.969779	15.0636	1.60272e-08	40.285																		1	S	KVKAPVIVQFSNGGASFIAGKGVKSDVPQGA	X;X;X;X;X;X;X;X;X;X;X;X;X;X;X;Phospho (STY);X;X;X;X;X;X;X;X;X;X;X;X;X;X;X	XPPPPPPPPPPPPPPPPPPPPXXXXXXXXXX	VKAPVIVQFS(0.013)NGGAS(0.987)FIAGK	VKAPVIVQFS(-19)NGGAS(19)FIAGK	15	3	1.5933	6038400	6038400
sp|P37840|SYUA_HUMAN	22	sp|P37840|SYUA_HUMAN	sp|P37840|SYUA_HUMAN	sp|P37840|SYUA_HUMAN Alpha-synuclein OS=Homo sapiens OX=9606 GN=SNCA PE=1 SV=1	Alpha-synuclein	SNCA	1	95.2091	1.86237e-36	110.6	95.287	95.209	1	110.602	1.86237e-36	110.6	1	95.2091	6.51512e-28	95.209																		1	T	GLSKAKEGVVAAAEKTKQGVAEAAGKTKEGV	X;X;X;X;X;X;X;X;X;X;X;X;X;X;X;Phospho (STY);X;X;X;X;X;X;X;X;X;X;Phospho (STY);X;X;X;X	XXXXXXPPPPPPPPPPPPPPPPPPPPXXXXX	EGVVAAAEKT(1)KQGVAEAAGK	EGVVAAAEKT(95)KQGVAEAAGK	10	3	-0.20209	47514000	47514000
sp|P37840|SYUA_HUMAN	33	sp|P37840|SYUA_HUMAN	sp|P37840|SYUA_HUMAN	sp|P37840|SYUA_HUMAN Alpha-synuclein OS=Homo sapiens OX=9606 GN=SNCA PE=1 SV=1	Alpha-synuclein	SNCA	0.997586	28.376	2.28445e-08	49.638	46.35	42.106					0.993357	24.0333	3.00555e-05	49.638									0.997586	28.376	2.28445e-08	42.106						1	T	AAEKTKQGVAEAAGKTKEGVLYVGSKTKEGV	X;X;X;X;Phospho (STY);X;X;X;X;X;X;X;X;X;X;Phospho (STY);X;X;X;X;X;X;X;X;Phospho (STY);X;Phospho (STY);X;X;X;X	XXXXXXPPPPPPPPPPPPPPPPPPPPXXXXX	QGVAEAAGKT(0.998)KEGVLY(0.001)VGS(0.001)K	QGVAEAAGKT(28)KEGVLY(-30)VGS(-28)K	10	3	1.7047	30169000	30169000
sp|P37840|SYUA_HUMAN	42	sp|P37840|SYUA_HUMAN	sp|P37840|SYUA_HUMAN	sp|P37840|SYUA_HUMAN Alpha-synuclein OS=Homo sapiens OX=9606 GN=SNCA PE=1 SV=1	Alpha-synuclein	SNCA	0.817624	6.51591	2.79471e-06	103.43	91.585	73.093					0.598582	1.73541	0.00226677	67.685					0.686095	3.39591	2.79471e-06	103.43	0.817624	6.51591	0.00068434	73.093						1	S	AEAAGKTKEGVLYVGSKTKEGVVHGVATVAE	X;X;X;X;X;X;X;X;X;X;X;X;X;X;X;Phospho (STY);X;Phospho (STY);X;X;X;X;X;X;X;X;X;Phospho (STY);X;X;X	XXXXXXPPPPPPPPPPPPPXXXXXXXXXXXX	TKEGVLYVGS(0.818)KT(0.182)K	T(-69)KEGVLY(-56)VGS(6.5)KT(-6.5)K	10	3	1.16	24410000	24410000
sp|P37840|SYUA_HUMAN	44	sp|P37840|SYUA_HUMAN	sp|P37840|SYUA_HUMAN	sp|P37840|SYUA_HUMAN Alpha-synuclein OS=Homo sapiens OX=9606 GN=SNCA PE=1 SV=1	Alpha-synuclein	SNCA	1	64.2642	1.51443e-08	81.016	64.264	81.016					1	64.2642	6.2146e-08	81.016					0.79658	6.32462	1.51443e-08	47.757	0.809356	6.40046	1.63094e-07	52.237						1	T	AAGKTKEGVLYVGSKTKEGVVHGVATVAEKT	X;X;X;X;Phospho (STY);X;X;X;X;X;X;X;X;X;X;Phospho (STY);X;X;X;X;X;X;X;X;X;Phospho (STY);X;X;X;X;X	XXXXXXPPPPPPPPPPPPPPPPPPPPPPPPX	T(1)KEGVVHGVATVAEK	T(64)KEGVVHGVAT(-64)VAEK	1	3	0.25036	45839000	45839000
sp|P37840|SYUA_HUMAN	54	sp|P37840|SYUA_HUMAN	sp|P37840|SYUA_HUMAN	sp|P37840|SYUA_HUMAN Alpha-synuclein OS=Homo sapiens OX=9606 GN=SNCA PE=1 SV=1	Alpha-synuclein	SNCA	1	68.034	1.11213e-76	141.54	105.12	68.034	1	50.6533	7.032e-05	53.278	1	141.536	1.11213e-76	141.54					1	68.034	0.00557779	68.034										1	T	YVGSKTKEGVVHGVATVAEKTKEQVTNVGGA	X;X;X;Phospho (STY);X;X;X;X;X;X;X;X;X;X;X;Phospho (STY);X;X;X;X;X;X;X;X;X;Phospho (STY);X;X;X;X;X	XXXXXPPPPPPPPPPPPPPPXXXXXXXXXXX	EGVVHGVAT(1)VAEK	EGVVHGVAT(68)VAEK	9	2	-0.60372	24777000	24777000
sp|P37840|SYUA_HUMAN	64	sp|P37840|SYUA_HUMAN	sp|P37840|SYUA_HUMAN	sp|P37840|SYUA_HUMAN Alpha-synuclein OS=Homo sapiens OX=9606 GN=SNCA PE=1 SV=1	Alpha-synuclein	SNCA	0.991815	20.8342	4.74636e-74	125.73	114.04	125.73	0.936859	11.7139	2.85373e-16	87.439	0.777462	5.44246	4.87369e-07	66.045	0.991815	20.8342	4.74636e-74	125.73	0.832976	6.98065	7.06931e-07	67.728	0.676381	3.20464	1.80341e-06	59.893						1	T	VHGVATVAEKTKEQVTNVGGAVVTGVTAVAQ	X;X;X;X;X;Phospho (STY);X;X;X;X;X;X;X;X;X;Phospho (STY);X;X;X;X;X;X;X;X;X;X;X;X;X;X;X	XXXXXXXXXXPPPPPPPPPPPPPPPPPPPPP	T(0.008)KEQVT(0.992)NVGGAVVTGVTA	T(-21)KEQVT(21)NVGGAVVT(-90)GVT(-110)A	6	2	0.86868	494390000	494390000
sp|P37840|SYUA_HUMAN	72	sp|P37840|SYUA_HUMAN	sp|P37840|SYUA_HUMAN	sp|P37840|SYUA_HUMAN Alpha-synuclein OS=Homo sapiens OX=9606 GN=SNCA PE=1 SV=1	Alpha-synuclein	SNCA	0.975687	16.0827	1.95468e-24	77.533	74.545	77.533	0.975687	16.0827	4.60398e-08	77.533	0.318016	0	1.95468e-24	46.898					0.868987	9.32978	1.66733e-06	51.386										1	T	EKTKEQVTNVGGAVVTGVTAVAQKTVEGAGS	X;X;X;X;X;X;X;X;X;X;X;X;X;X;X;Phospho (STY);X;X;X;X;X;X;X;X;Phospho (STY);X;X;X;X;X;Phospho (STY)	XXPPPPPPPPPPPPPPPPPPPPPPPPPPPPP	TKEQVTNVGGAVVT(0.976)GVT(0.024)AVAQK	T(-42)KEQVT(-37)NVGGAVVT(16)GVT(-16)AVAQK	14	3	-0.45705	15155000	15155000
sp|P37840|SYUA_HUMAN	75	sp|P37840|SYUA_HUMAN	sp|P37840|SYUA_HUMAN	sp|P37840|SYUA_HUMAN Alpha-synuclein OS=Homo sapiens OX=9606 GN=SNCA PE=1 SV=1	Alpha-synuclein	SNCA	0.912338	10.1735	5.90238e-34	76.31	67.92	76.31	0.772785	5.31872	5.90238e-34	62.611	0.912338	10.1735	1.95468e-24	76.31					0.817831	6.53108	3.09547e-06	55.128	0.865547	8.09093	3.16115e-06	54.66						1	T	KEQVTNVGGAVVTGVTAVAQKTVEGAGSIAA	X;X;X;X;X;X;X;X;X;X;X;X;X;X;X;Phospho (STY);X;X;X;X;X;Phospho (STY);X;X;X;X;X;Phospho (STY);X;X;X	PPPPPPPPPPPPPPPPPPPPPPPPPPPPPPP	TKEQVTNVGGAVVT(0.088)GVT(0.912)AVAQK	T(-63)KEQVT(-59)NVGGAVVT(-10)GVT(10)AVAQK	17	3	0.64542	66881000	66881000
sp|P37840|SYUA_HUMAN	81	sp|P37840|SYUA_HUMAN	sp|P37840|SYUA_HUMAN	sp|P37840|SYUA_HUMAN Alpha-synuclein OS=Homo sapiens OX=9606 GN=SNCA PE=1 SV=1	Alpha-synuclein	SNCA	0.999999	63.4353	5.90238e-34	79.022	65.618	79.022	0.431404	0	5.90238e-34	62.603	0.999999	63.4353	1.95468e-24	79.022					0.879386	11.0772	6.36314e-33	69.334										1	T	VGGAVVTGVTAVAQKTVEGAGSIAAATGFVK	X;X;X;X;X;X;Phospho (STY);X;X;Phospho (STY);X;X;X;X;X;Phospho (STY);X;X;X;X;X;X;X;X;X;X;X;X;X;X;X	PPPPPPPPPPPPPPPPPPPPPPPPPPPPPPP	T(1)VEGAGSIAAATGFVK	T(63)VEGAGS(-63)IAAAT(-73)GFVK	1	2	0.78783	7628900	7628900
sp|P37840|SYUA_HUMAN	87	sp|P37840|SYUA_HUMAN	sp|P37840|SYUA_HUMAN	sp|P37840|SYUA_HUMAN Alpha-synuclein OS=Homo sapiens OX=9606 GN=SNCA PE=1 SV=1	Alpha-synuclein	SNCA	0.998069	28.0025	0.000540185	63.894	43.053	63.894					0.998069	28.0025	0.000540185	63.894																		1	S	TGVTAVAQKTVEGAGSIAAATGFVKKDQLGK	Phospho (STY);X;X;Phospho (STY);X;X;X;X;X;X;X;X;X;X;X;Phospho (STY);X;X;X;X;X;X;X;X;X;X;X;X;X;X;X	XXXXXXXXXPPPPPPPPPPPPPPPPPXXXXX	TVEGAGS(0.998)IAAAT(0.002)GFVK	T(-35)VEGAGS(28)IAAAT(-28)GFVK	7	2	-0.49314	43415000	43415000
sp|P37840|SYUA_HUMAN	92	sp|P37840|SYUA_HUMAN	sp|P37840|SYUA_HUMAN	sp|P37840|SYUA_HUMAN Alpha-synuclein OS=Homo sapiens OX=9606 GN=SNCA PE=1 SV=1	Alpha-synuclein	SNCA	0.999995	52.7835	8.37458e-24	106.19	84.957	106.19	0.998949	29.7784	2.71073e-11	86.378	0.999995	52.7835	8.37458e-24	106.19																		1	T	VAQKTVEGAGSIAAATGFVKKDQLGKNEEGA	X;X;X;X;X;X;X;X;X;X;X;X;X;X;X;Phospho (STY);X;X;X;X;X;X;X;X;X;X;X;X;X;X;X	XXXXPPPPPPPPPPPPPPPPXXXXXXXXXXX	TVEGAGSIAAAT(1)GFVK	T(-100)VEGAGS(-53)IAAAT(53)GFVK	12	2	1.6582	5635300	5635300
sp|P37840|SYUA_HUMAN	129	sp|P37840|SYUA_HUMAN	sp|P37840|SYUA_HUMAN	sp|P37840|SYUA_HUMAN Alpha-synuclein OS=Homo sapiens OX=9606 GN=SNCA PE=1 SV=1	Alpha-synuclein	SNCA	1	92.5385	1.5674e-09	115.29	108.7	92.538									1	92.5385	1.5674e-09	115.29														1	S	EDMPVDPDNEAYEMPSEEGYQDYEPEA____	X;X;Oxidation (M);X;X;X;X;X;X;X;X;X;X;Oxidation (M);X;Phospho (STY);X;X;X;X;X;X;X;X;X;X;X;X;X;X;X	XXXXXXXXXXXXXXXPPPPPPPPPPPPXXXX	S(1)EEGYQDYEP	S(93)EEGY(-93)QDY(-93)EP	1	2	1.2584	385890000	385890000
sp|Q8X7Y9|YBHG_ECO57	172	sp|Q8X7Y9|YBHG_ECO57	sp|Q8X7Y9|YBHG_ECO57	sp|Q8X7Y9|YBHG_ECO57 UPF0194 membrane protein YbhG OS=Escherichia coli O157:H7 OX=83334 GN=ybhG PE=3 SV=1	UPF0194 membrane protein YbhG	ybhG	1	49.3585	0.00407578	49.358	12.963	49.358									1	49.3585	0.00407578	49.358														1	Y	QAQATLKSAQDKLRQYRSGNREQDIAQAKAS	X;X;X;X;X;X;X;X;X;X;X;X;X;X;X;Phospho (STY);X;X;X;X;X;X;X;X;X;X;X;X;X;X;X	XXXXXXXXXPPPPPPPPXXXXXXXXXXXXXX	QDKLRQY(1)R	QDKLRQY(49)R	7	2	-1.235	0	0
sp|Q9H4B4|PLK3_HUMAN	156	sp|Q9H4B4|PLK3_HUMAN	sp|Q9H4B4|PLK3_HUMAN	sp|Q9H4B4|PLK3_HUMAN Serine/threonine-protein kinase PLK3 OS=Homo sapiens OX=9606 GN=PLK3 PE=1 SV=2	Serine/threonine-protein kinase PLK3	PLK3	1	75.3164	0.00223246	75.316	61.451	75.316	1	47.7736	0.0111456	47.774	1	75.3164	0.00223246	75.316																		1	T	LCSRKSLAHIWKARHTLLEPEVRYYLRQILS	X;X;X;X;X;X;X;X;X;X;X;X;X;X;X;Phospho (STY);X;X;X;X;X;X;X;X;X;X;X;X;X;X;X	XXXXXXXXXXXXPPPPPPPPPPPXXXXXXXX	ARHT(1)LLEPEVR	ARHT(75)LLEPEVR	4	3	-0.41355	13846000	13846000
sp|Q9H4B4|PLK3_HUMAN	219	sp|Q9H4B4|PLK3_HUMAN	sp|Q9H4B4|PLK3_HUMAN	sp|Q9H4B4|PLK3_HUMAN Serine/threonine-protein kinase PLK3 OS=Homo sapiens OX=9606 GN=PLK3 PE=1 SV=2	Serine/threonine-protein kinase PLK3	PLK3	0.776978	5.42539	0.000291299	69.72	64.511	69.72					0.776978	5.42539	0.000291299	69.72																		1	T	FGLAARLEPPEQRKKTICGTPNYVAPEVLLR	X;X;X;X;X;X;X;X;X;X;X;X;X;X;X;Phospho (STY);X;X;X;X;X;X;X;X;X;X;X;X;X;X;X	XXXXXXXXXXXXXPPPPPPPPPPPPPPPPPP	KKT(0.777)ICGT(0.223)PNYVAPEVLLR	KKT(5.4)ICGT(-5.4)PNY(-35)VAPEVLLR	3	3	-1.3026	12346000	12346000
sp|Q9H4B4|PLK3_HUMAN	278	sp|Q9H4B4|PLK3_HUMAN	sp|Q9H4B4|PLK3_HUMAN	sp|Q9H4B4|PLK3_HUMAN Serine/threonine-protein kinase PLK3 OS=Homo sapiens OX=9606 GN=PLK3 PE=1 SV=2	Serine/threonine-protein kinase PLK3	PLK3	0.999885	39.3996	3.79385e-16	93.381	87.916	93.381	0.999885	39.3996	3.79385e-16	93.381																						1	T	ADLKETYRCIKQVHYTLPASLSLPARQLLAA	X;X;X;X;X;X;X;X;X;X;X;X;X;X;X;Phospho (STY);X;X;X;X;X;X;X;X;X;X;X;X;X;X;X	XXXXXXXXXXXPPPPPPPPPPPPPPPXXXXX	QVHYT(1)LPASLSLPAR	QVHY(-39)T(39)LPAS(-70)LS(-84)LPAR	5	3	0.09586	4993400	4993400
sp|Q9H4B4|PLK3_HUMAN	304	sp|Q9H4B4|PLK3_HUMAN	sp|Q9H4B4|PLK3_HUMAN	sp|Q9H4B4|PLK3_HUMAN Serine/threonine-protein kinase PLK3 OS=Homo sapiens OX=9606 GN=PLK3 PE=1 SV=2	Serine/threonine-protein kinase PLK3	PLK3	1	103.833	0.000183234	103.88	77.208	103.83	1	103.88	0.000183234	103.88	1	60.4336	0.00302232	60.434	1	103.833	0.00740403	103.83														1	S	QLLAAILRASPRDRPSIDQILRHDFFTKGYT	X;X;X;X;X;X;X;X;X;X;X;X;X;X;X;Phospho (STY);X;X;X;X;X;X;X;X;X;X;X;X;X;X;X	XXXXXXXXXXXXPPPPPPPPPPXXXXXXXXX	S(1)IDQILR	S(100)IDQILR	1	2	0.9901	31393000	31393000
tr|A0A0H3JCU6|A0A0H3JCU6_ECO57	81	tr|A0A0H3JCU6|A0A0H3JCU6_ECO57	tr|A0A0H3JCU6|A0A0H3JCU6_ECO57	tr|A0A0H3JCU6|A0A0H3JCU6_ECO57 Uncharacterized protein OS=Escherichia coli O157:H7 OX=83334 GN=ybdM PE=4 SV=1	Uncharacterized protein	ybdM	1	43.2463	0.00288434	54.549	27.947	43.246													1	46.4258	0.00288434	54.549	1	43.2463	0.00845992	43.246						1	S	NPNVMAPGEKKLLKQSLEKDGFTQPVVVSEE	X;X;X;X;X;X;X;X;X;X;X;X;X;X;X;Phospho (STY);X;X;X;X;X;X;X;X;X;X;X;X;X;X;X	XXXXXXXXXXPPPPPPPPPXXXXXXXXXXXX	KLLKQS(1)LEK	KLLKQS(43)LEK	6	2	3.0945	1981300	1981300
tr|Q8X7N5|Q8X7N5_ECO57	120	tr|Q8X7N5|Q8X7N5_ECO57	tr|Q8X7N5|Q8X7N5_ECO57	tr|Q8X7N5|Q8X7N5_ECO57 Outer membrane phosphoporin protein E OS=Escherichia coli O157:H7 OX=83334 GN=phoE PE=3 SV=1	Outer membrane phosphoporin protein E	phoE	1	43.2463	0.0160805	43.246	31.735	43.246																					1	43.2463	0.0160805	43.246		1	Y	KDLGSFDYGRNLGALYDVEAWTDMFPEFGGD	X;X;X;X;X;X;X;X;X;X;X;X;X;X;X;Phospho (STY);X;X;X;X;X;X;X;X;X;X;X;X;X;X;X	XXXXXXXXXXPPPPPPPPPPXXXXXXXXXXX	NLGALY(1)DVEA	NLGALY(43)DVEA	6	2	-0.50185	633520	633520
tr|Q8XB69|Q8XB69_ECO57	524	tr|Q8XB69|Q8XB69_ECO57	tr|Q8XB69|Q8XB69_ECO57	tr|Q8XB69|Q8XB69_ECO57 Type I restriction-modification enzyme R subunit OS=Escherichia coli O157:H7 OX=83334 GN=hsdR PE=4 SV=1	Type I restriction-modification enzyme R subunit	hsdR	1	40.8819	0.00647542	40.882	27.79	40.882					1	40.8819	0.00647542	40.882																		1	T	NIQSMTKFKQIIGRGTRIDERYGKLWFTILD	X;X;X;X;X;X;X;X;X;X;X;X;X;X;X;Phospho (STY);X;X;X;X;X;X;X;X;X;X;X;X;X;X;X	XXXXXXXXXPPPPPPPPPPPPXXXXXXXXXX	QIIGRGT(1)RIDER	QIIGRGT(41)RIDER	7	2	0.96497	0	0
tr|Q8XED9|Q8XED9_ECO57	1348	tr|Q8XED9|Q8XED9_ECO57	tr|Q8XED9|Q8XED9_ECO57	tr|Q8XED9|Q8XED9_ECO57 Type IV secretion protein Rhs OS=Escherichia coli O157:H7 OX=83334 GN=rhsC PE=3 SV=1	Type IV secretion protein Rhs	rhsC	1	75.1893	0.000264232	75.189	6.8067	75.189																					1	75.1893	0.000264232	75.189		1	T	GKNSFAQKLANELDATVIAPDEIIWIWPDGN	X;X;X;X;X;X;X;X;X;X;X;X;X;X;X;Phospho (STY);X;X;X;X;X;X;X;X;X;X;X;X;X;X;X	XXXXXXXXXXPPPPPPPPPXXXXXXXXXXXX	NELDAT(1)VIA	NELDAT(75)VIA	6	2	0.93072	0	0
[truncated: 73 more columns]

## Sheet: pSTY sites SNCA Class I
Proteins	Positions within proteins	Leading proteins	Protein	Fasta headers	Protein names	Gene names	Localization prob	Score diff	PEP	Score	Delta score	Score for localization	Localization prob alpha-Syn_PLK3-01	Score diff alpha-Syn_PLK3-01	PEP alpha-Syn_PLK3-01	Score alpha-Syn_PLK3-01	Localization prob alpha-Syn_PLK3-02	Score diff alpha-Syn_PLK3-02	PEP alpha-Syn_PLK3-02	Score alpha-Syn_PLK3-02	Localization prob alpha-Syn_PLK3-03	Score diff alpha-Syn_PLK3-03	PEP alpha-Syn_PLK3-03	Score alpha-Syn_PLK3-03	Localization prob alpha-Syn-01	Score diff alpha-Syn-01	PEP alpha-Syn-01	Score alpha-Syn-01	Localization prob alpha-Syn-02	Score diff alpha-Syn-02	PEP alpha-Syn-02	Score alpha-Syn-02	Localization prob alpha-Syn-03	Score diff alpha-Syn-03	PEP alpha-Syn-03	Score alpha-Syn-03	Diagnostic peak	Number of Phospho (STY)	Amino acid	Sequence window	Modification window	Peptide window coverage	Phospho (STY) Probabilities	Phospho (STY) Score diffs	Position in peptide	Charge	Mass error [ppm]	Intensity	Intensity___1
sp|P37840|SYUA_HUMAN	22	sp|P37840|SYUA_HUMAN	sp|P37840|SYUA_HUMAN	sp|P37840|SYUA_HUMAN Alpha-synuclein OS=Homo sapiens OX=9606 GN=SNCA PE=1 SV=1	Alpha-synuclein	SNCA	1	95.2091	1.86237e-36	110.6	95.287	95.209	1	110.602	1.86237e-36	110.6	1	95.2091	6.51512e-28	95.209																		1	T	GLSKAKEGVVAAAEKTKQGVAEAAGKTKEGV	X;X;X;X;X;X;X;X;X;X;X;X;X;X;X;Phospho (STY);X;X;X;X;X;X;X;X;X;X;Phospho (STY);X;X;X;X	XXXXXXPPPPPPPPPPPPPPPPPPPPXXXXX	EGVVAAAEKT(1)KQGVAEAAGK	EGVVAAAEKT(95)KQGVAEAAGK	10	3	-0.20209	47514000	47514000
sp|P37840|SYUA_HUMAN	33	sp|P37840|SYUA_HUMAN	sp|P37840|SYUA_HUMAN	sp|P37840|SYUA_HUMAN Alpha-synuclein OS=Homo sapiens OX=9606 GN=SNCA PE=1 SV=1	Alpha-synuclein	SNCA	0.997586	28.376	2.28445e-08	49.638	46.35	42.106					0.993357	24.0333	3.00555e-05	49.638									0.997586	28.376	2.28445e-08	42.106						1	T	AAEKTKQGVAEAAGKTKEGVLYVGSKTKEGV	X;X;X;X;Phospho (STY);X;X;X;X;X;X;X;X;X;X;Phospho (STY);X;X;X;X;X;X;X;X;Phospho (STY);X;Phospho (STY);X;X;X;X	XXXXXXPPPPPPPPPPPPPPPPPPPPXXXXX	QGVAEAAGKT(0.998)KEGVLY(0.001)VGS(0.001)K	QGVAEAAGKT(28)KEGVLY(-30)VGS(-28)K	10	3	1.7047	30169000	30169000
sp|P37840|SYUA_HUMAN	42	sp|P37840|SYUA_HUMAN	sp|P37840|SYUA_HUMAN	sp|P37840|SYUA_HUMAN Alpha-synuclein OS=Homo sapiens OX=9606 GN=SNCA PE=1 SV=1	Alpha-synuclein	SNCA	0.817624	6.51591	2.79471e-06	103.43	91.585	73.093					0.598582	1.73541	0.00226677	67.685					0.686095	3.39591	2.79471e-06	103.43	0.817624	6.51591	0.00068434	73.093						1	S	AEAAGKTKEGVLYVGSKTKEGVVHGVATVAE	X;X;X;X;X;X;X;X;X;X;X;X;X;X;X;Phospho (STY);X;Phospho (STY);X;X;X;X;X;X;X;X;X;Phospho (STY);X;X;X	XXXXXXPPPPPPPPPPPPPXXXXXXXXXXXX	TKEGVLYVGS(0.818)KT(0.182)K	T(-69)KEGVLY(-56)VGS(6.5)KT(-6.5)K	10	3	1.16	24410000	24410000
sp|P37840|SYUA_HUMAN	44	sp|P37840|SYUA_HUMAN	sp|P37840|SYUA_HUMAN	sp|P37840|SYUA_HUMAN Alpha-synuclein OS=Homo sapiens OX=9606 GN=SNCA PE=1 SV=1	Alpha-synuclein	SNCA	1	64.2642	1.51443e-08	81.016	64.264	81.016					1	64.2642	6.2146e-08	81.016					0.79658	6.32462	1.51443e-08	47.757	0.809356	6.40046	1.63094e-07	52.237						1	T	AAGKTKEGVLYVGSKTKEGVVHGVATVAEKT	X;X;X;X;Phospho (STY);X;X;X;X;X;X;X;X;X;X;Phospho (STY);X;X;X;X;X;X;X;X;X;Phospho (STY);X;X;X;X;X	XXXXXXPPPPPPPPPPPPPPPPPPPPPPPPX	T(1)KEGVVHGVATVAEK	T(64)KEGVVHGVAT(-64)VAEK	1	3	0.25036	45839000	45839000
sp|P37840|SYUA_HUMAN	54	sp|P37840|SYUA_HUMAN	sp|P37840|SYUA_HUMAN	sp|P37840|SYUA_HUMAN Alpha-synuclein OS=Homo sapiens OX=9606 GN=SNCA PE=1 SV=1	Alpha-synuclein	SNCA	1	68.034	1.11213e-76	141.54	105.12	68.034	1	50.6533	7.032e-05	53.278	1	141.536	1.11213e-76	141.54					1	68.034	0.00557779	68.034										1	T	YVGSKTKEGVVHGVATVAEKTKEQVTNVGGA	X;X;X;Phospho (STY);X;X;X;X;X;X;X;X;X;X;X;Phospho (STY);X;X;X;X;X;X;X;X;X;Phospho (STY);X;X;X;X;X	XXXXXPPPPPPPPPPPPPPPXXXXXXXXXXX	EGVVHGVAT(1)VAEK	EGVVHGVAT(68)VAEK	9	2	-0.60372	24777000	24777000
sp|P37840|SYUA_HUMAN	64	sp|P37840|SYUA_HUMAN	sp|P37840|SYUA_HUMAN	sp|P37840|SYUA_HUMAN Alpha-synuclein OS=Homo sapiens OX=9606 GN=SNCA PE=1 SV=1	Alpha-synuclein	SNCA	0.991815	20.8342	4.74636e-74	125.73	114.04	125.73	0.936859	11.7139	2.85373e-16	87.439	0.777462	5.44246	4.87369e-07	66.045	0.991815	20.8342	4.74636e-74	125.73	0.832976	6.98065	7.06931e-07	67.728	0.676381	3.20464	1.80341e-06	59.893						1	T	VHGVATVAEKTKEQVTNVGGAVVTGVTAVAQ	X;X;X;X;X;Phospho (STY);X;X;X;X;X;X;X;X;X;Phospho (STY);X;X;X;X;X;X;X;X;X;X;X;X;X;X;X	XXXXXXXXXXPPPPPPPPPPPPPPPPPPPPP	T(0.008)KEQVT(0.992)NVGGAVVTGVTA	T(-21)KEQVT(21)NVGGAVVT(-90)GVT(-110)A	6	2	0.86868	494390000	494390000
sp|P37840|SYUA_HUMAN	72	sp|P37840|SYUA_HUMAN	sp|P37840|SYUA_HUMAN	sp|P37840|SYUA_HUMAN Alpha-synuclein OS=Homo sapiens OX=9606 GN=SNCA PE=1 SV=1	Alpha-synuclein	SNCA	0.975687	16.0827	1.95468e-24	77.533	74.545	77.533	0.975687	16.0827	4.60398e-08	77.533	0.318016	0	1.95468e-24	46.898					0.868987	9.32978	1.66733e-06	51.386										1	T	EKTKEQVTNVGGAVVTGVTAVAQKTVEGAGS	X;X;X;X;X;X;X;X;X;X;X;X;X;X;X;Phospho (STY);X;X;X;X;X;X;X;X;Phospho (STY);X;X;X;X;X;Phospho (STY)	XXPPPPPPPPPPPPPPPPPPPPPPPPPPPPP	TKEQVTNVGGAVVT(0.976)GVT(0.024)AVAQK	T(-42)KEQVT(-37)NVGGAVVT(16)GVT(-16)AVAQK	14	3	-0.45705	15155000	15155000
sp|P37840|SYUA_HUMAN	75	sp|P37840|SYUA_HUMAN	sp|P37840|SYUA_HUMAN	sp|P37840|SYUA_HUMAN Alpha-synuclein OS=Homo sapiens OX=9606 GN=SNCA PE=1 SV=1	Alpha-synuclein	SNCA	0.912338	10.1735	5.90238e-34	76.31	67.92	76.31	0.772785	5.31872	5.90238e-34	62.611	0.912338	10.1735	1.95468e-24	76.31					0.817831	6.53108	3.09547e-06	55.128	0.865547	8.09093	3.16115e-06	54.66						1	T	KEQVTNVGGAVVTGVTAVAQKTVEGAGSIAA	X;X;X;X;X;X;X;X;X;X;X;X;X;X;X;Phospho (STY);X;X;X;X;X;Phospho (STY);X;X;X;X;X;Phospho (STY);X;X;X	PPPPPPPPPPPPPPPPPPPPPPPPPPPPPPP	TKEQVTNVGGAVVT(0.088)GVT(0.912)AVAQK	T(-63)KEQVT(-59)NVGGAVVT(-10)GVT(10)AVAQK	17	3	0.64542	66881000	66881000
sp|P37840|SYUA_HUMAN	81	sp|P37840|SYUA_HUMAN	sp|P37840|SYUA_HUMAN	sp|P37840|SYUA_HUMAN Alpha-synuclein OS=Homo sapiens OX=9606 GN=SNCA PE=1 SV=1	Alpha-synuclein	SNCA	0.999999	63.4353	5.90238e-34	79.022	65.618	79.022	0.431404	0	5.90238e-34	62.603	0.999999	63.4353	1.95468e-24	79.022					0.879386	11.0772	6.36314e-33	69.334										1	T	VGGAVVTGVTAVAQKTVEGAGSIAAATGFVK	X;X;X;X;X;X;Phospho (STY);X;X;Phospho (STY);X;X;X;X;X;Phospho (STY);X;X;X;X;X;X;X;X;X;X;X;X;X;X;X	PPPPPPPPPPPPPPPPPPPPPPPPPPPPPPP	T(1)VEGAGSIAAATGFVK	T(63)VEGAGS(-63)IAAAT(-73)GFVK	1	2	0.78783	7628900	7628900
sp|P37840|SYUA_HUMAN	87	sp|P37840|SYUA_HUMAN	sp|P37840|SYUA_HUMAN	sp|P37840|SYUA_HUMAN Alpha-synuclein OS=Homo sapiens OX=9606 GN=SNCA PE=1 SV=1	Alpha-synuclein	SNCA	0.998069	28.0025	0.000540185	63.894	43.053	63.894					0.998069	28.0025	0.000540185	63.894																		1	S	TGVTAVAQKTVEGAGSIAAATGFVKKDQLGK	Phospho (STY);X;X;Phospho (STY);X;X;X;X;X;X;X;X;X;X;X;Phospho (STY);X;X;X;X;X;X;X;X;X;X;X;X;X;X;X	XXXXXXXXXPPPPPPPPPPPPPPPPPXXXXX	TVEGAGS(0.998)IAAAT(0.002)GFVK	T(-35)VEGAGS(28)IAAAT(-28)GFVK	7	2	-0.49314	43415000	43415000
sp|P37840|SYUA_HUMAN	92	sp|P37840|SYUA_HUMAN	sp|P37840|SYUA_HUMAN	sp|P37840|SYUA_HUMAN Alpha-synuclein OS=Homo sapiens OX=9606 GN=SNCA PE=1 SV=1	Alpha-synuclein	SNCA	0.999995	52.7835	8.37458e-24	106.19	84.957	106.19	0.998949	29.7784	2.71073e-11	86.378	0.999995	52.7835	8.37458e-24	106.19																		1	T	VAQKTVEGAGSIAAATGFVKKDQLGKNEEGA	X;X;X;X;X;X;X;X;X;X;X;X;X;X;X;Phospho (STY);X;X;X;X;X;X;X;X;X;X;X;X;X;X;X	XXXXPPPPPPPPPPPPPPPPXXXXXXXXXXX	TVEGAGSIAAAT(1)GFVK	T(-100)VEGAGS(-53)IAAAT(53)GFVK	12	2	1.6582	5635300	5635300
sp|P37840|SYUA_HUMAN	129	sp|P37840|SYUA_HUMAN	sp|P37840|SYUA_HUMAN	sp|P37840|SYUA_HUMAN Alpha-synuclein OS=Homo sapiens OX=9606 GN=SNCA PE=1 SV=1	Alpha-synuclein	SNCA	1	92.5385	1.5674e-09	115.29	108.7	92.538									1	92.5385	1.5674e-09	115.29														1	S	EDMPVDPDNEAYEMPSEEGYQDYEPEA____	X;X;Oxidation (M);X;X;X;X;X;X;X;X;X;X;Oxidation (M);X;Phospho (STY);X;X;X;X;X;X;X;X;X;X;X;X;X;X;X	XXXXXXXXXXXXXXXPPPPPPPPPPPPXXXX	S(1)EEGYQDYEP	S(93)EEGY(-93)QDY(-93)EP	1	2	1.2584	385890000	385890000
[truncated: 73 more columns]

## Sheet: pSTY sites SNCA summary
Positions within proteins	Amino acid	Protein names	Gene names	Localization prob	Score diff	PEP	Intensity alpha-Syn_PLK3-01	Intensity alpha-Syn_PLK3-02	Intensity alpha-Syn_PLK3-03	Intensity alpha-Syn-01	Intensity alpha-Syn-02	Intensity alpha-Syn-03
22	T	Alpha-synuclein	SNCA	1	95.2091	1.86237e-36	23718000	23796000	NaN	NaN	NaN	NaN
33	T	Alpha-synuclein	SNCA	0.997586	28.376	2.28445e-08	NaN	22113000	NaN	NaN	8056000	NaN
42	S	Alpha-synuclein	SNCA	0.817624	6.51591	2.79471e-06	NaN	8868200	NaN	NaN	7069600	NaN
44	T	Alpha-synuclein	SNCA	1	64.2642	1.51443e-08	NaN	23654000	NaN	3112400	10957000	NaN
54	T	Alpha-synuclein	SNCA	1	68.034	1.11213e-76	2116800	3720600	NaN	761970	NaN	NaN
64	T	Alpha-synuclein	SNCA	0.991815	20.8342	4.74636e-74	136260000	304030000	NaN	20849000	10643000	NaN
72	T	Alpha-synuclein	SNCA	0.975687	16.0827	1.95468e-24	7157500	NaN	NaN	7997400	NaN	NaN
75	T	Alpha-synuclein	SNCA	0.912338	10.1735	5.90238e-34	17113000	26202000	NaN	10624000	12943000	NaN
81	T	Alpha-synuclein	SNCA	0.999999	63.4353	5.90238e-34	NaN	2761100	NaN	NaN	NaN	NaN
87	S	Alpha-synuclein	SNCA	0.998069	28.0025	0.000540185	NaN	20273000	NaN	NaN	NaN	NaN
92	T	Alpha-synuclein	SNCA	0.999995	52.7835	8.37458e-24	1941900	3693400	NaN	NaN	NaN	NaN
129	S	Alpha-synuclein	SNCA	1	92.5385	1.5674e-09	NaN	NaN	73403000	NaN	NaN	NaN
										p
