# Supplementary material for: Secondary nucleation of α-Synuclein drives Mitochondria dysfunctions and Lewy body formation in Parkinson’s Disease
Source: bioRxiv preprint, doi:10.1101/2025.09.17.676873, version 1 (2025-09-19)
Supplement: Supporting info file [file 676873_file02.docx]

**Supporting information file**

**Secondary nucleation of α-Synuclein drives Mitochondria dysfunctions and Lewy body formation in Parkinson’s Disease**

Emily E. Prescott1,2, Jiapeng Wei3, Emma F. Garland1,2, Agnieszka Urbanek1,2, Francesco Capriglia1,2, Willem H. Molenkamp4, David P Rhodes1,2, Louise Heywood1,2, Aurelie Schwartzentruber1,2, Elezabeth Stephen1,2, Rachel Hughes1,2, Oliver Bandmann1,2, Mark O. Collins5, Sara Linse6, Axel Abelein4, Jan Johansson4, Michele Vendruscolo3, J Robin Highly1,2, Tuomas P.J. Knowles3,7,*, Heather Mortiboys1,2,*, Suman De1,2,8*

**
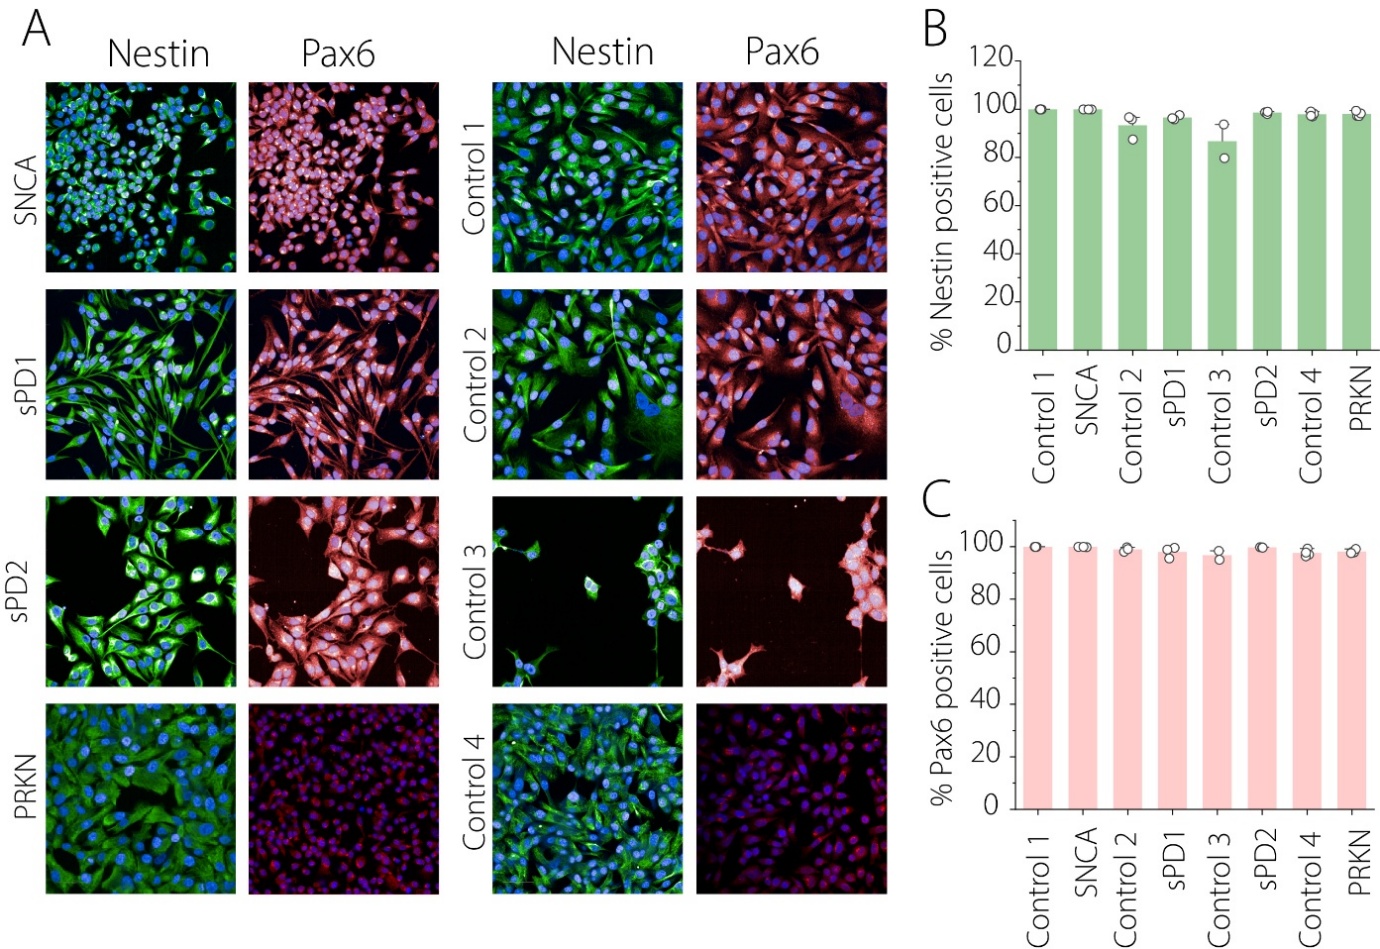
**

**Figure S1. (A)** Immunofluorescence staining of iNPCs for markers: Nestin and Pax6 in patient and NHC lines **(B-C)** Quantification of marker-positive cells as a percentage of total nuclei (Hoechst) with Nestin (B) and Pax6 (C)


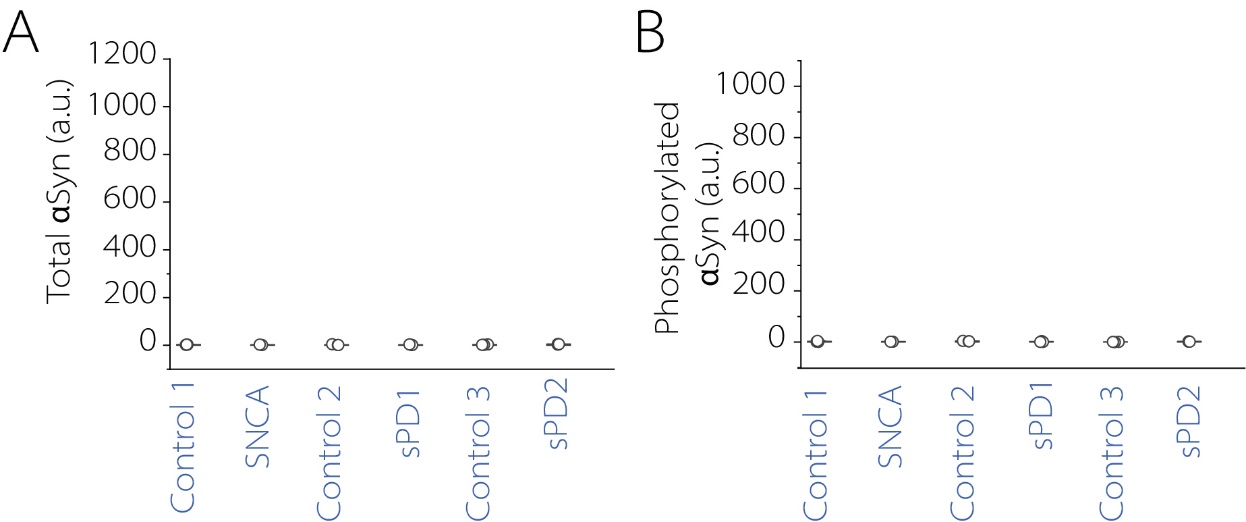


**Figure S2. (A -B)** Quantification of total αSyn(A), phosphorylated αSyn (pS129) (B), in fibroblast lysate across cell lines using an MSD assay.


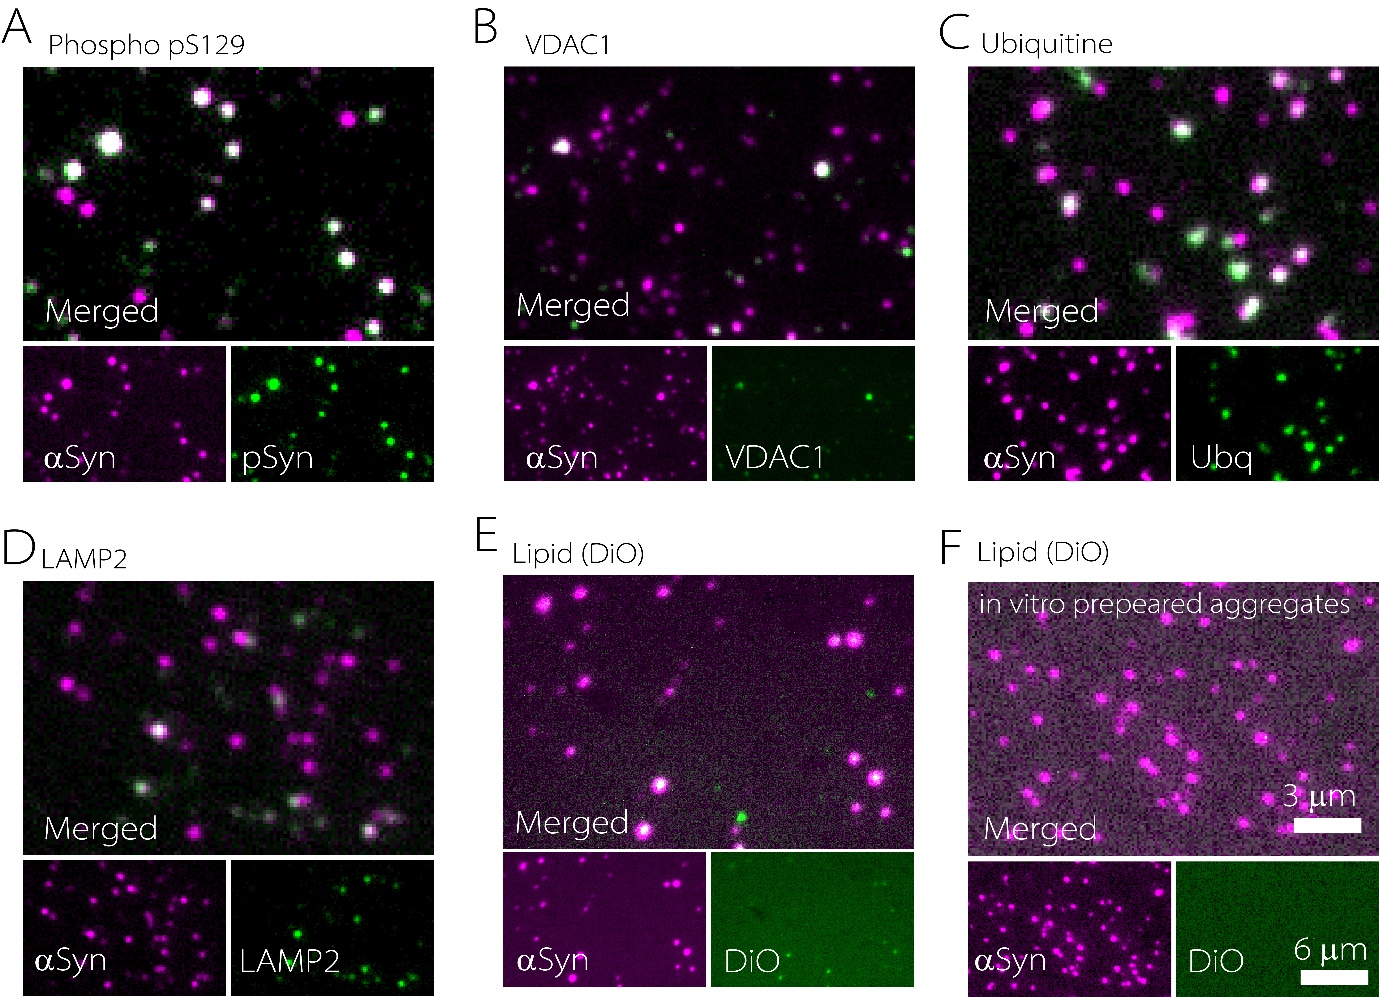


**Figure S3. (A-E)** Representative SiMPull images showing colocalization of αSyn aggregates with phosphorylated αSyn (pS129) (A), VDAC1 (B), Ubiquitin (C), LAMP2 (D), and Lipid (E) in iNL lysate. **(F)** Colocalization of recombinant αSyn aggregates with lipid marker DiO.


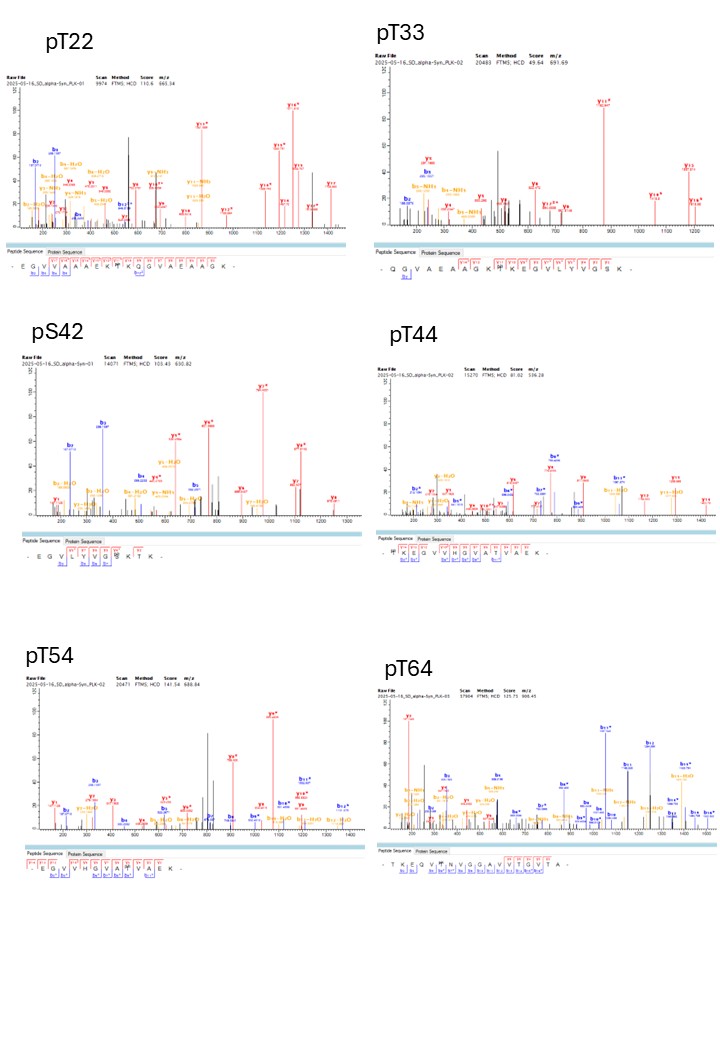

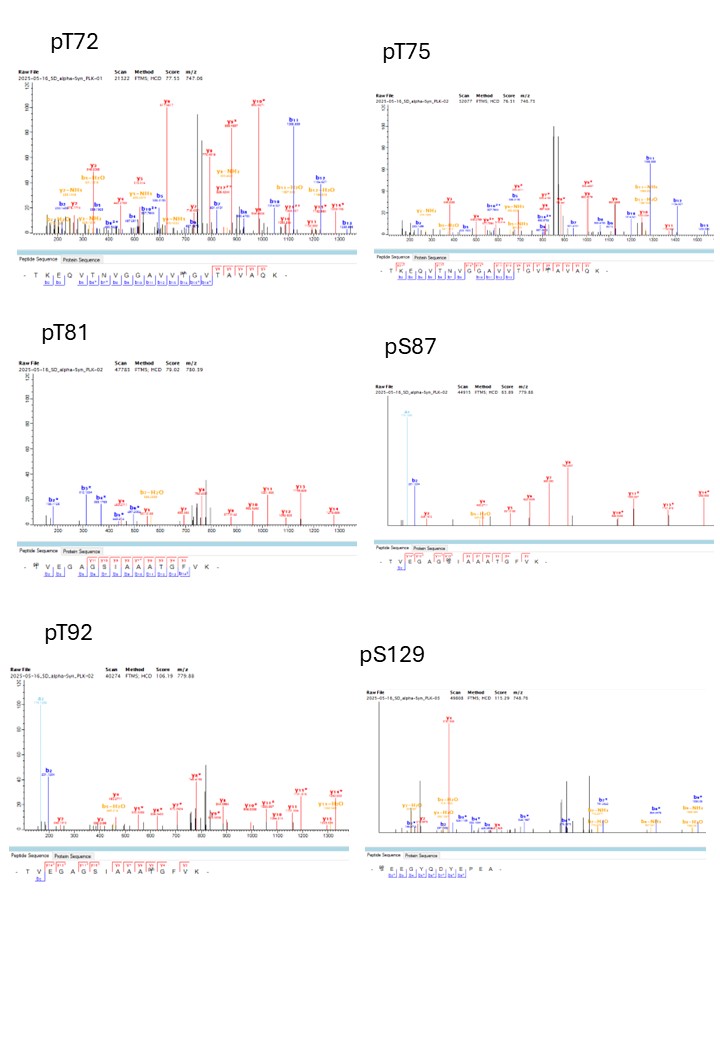


**Figure S4. Identification of phosphorylation sites using mass spectrometry.**

**
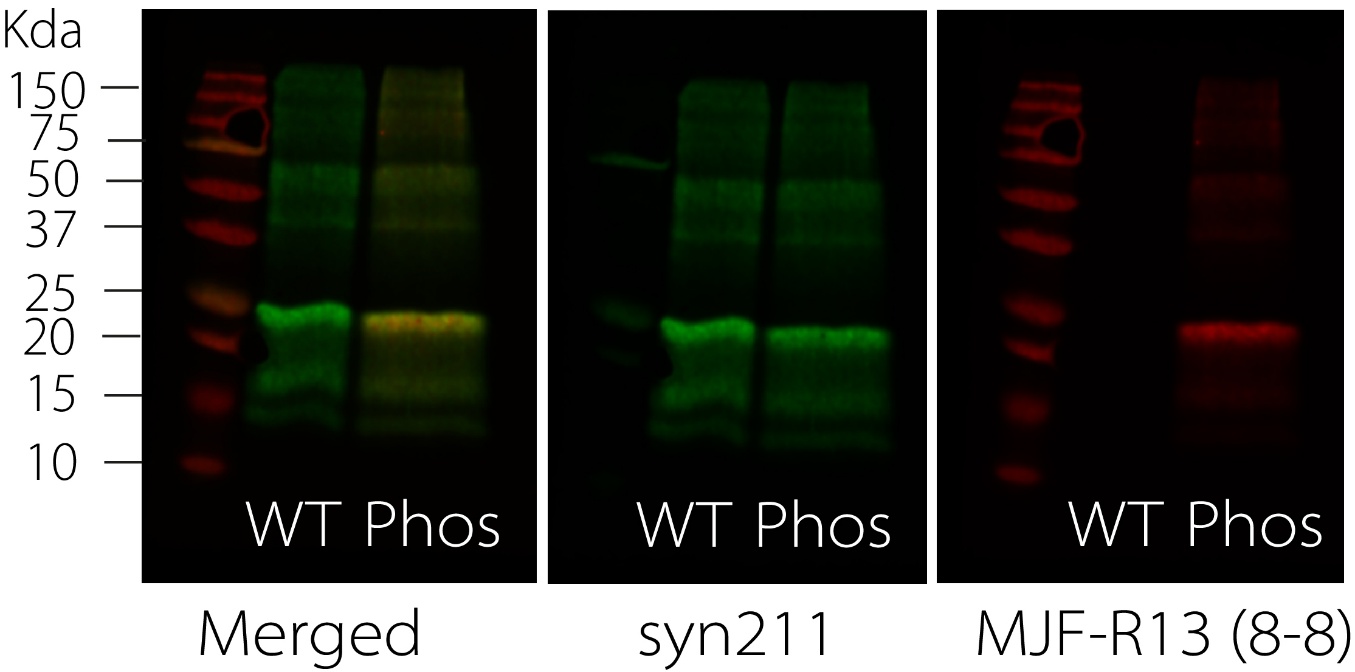
**

**Figure S5** Western blot confirming phosphorylation of AF488 labelled recombinant αSyn. WT αSyn was detected using Syn211 antibodies, and phosphorylated αSyn was detected using the phospho-specific MJF-R13 (8-8) antibody.


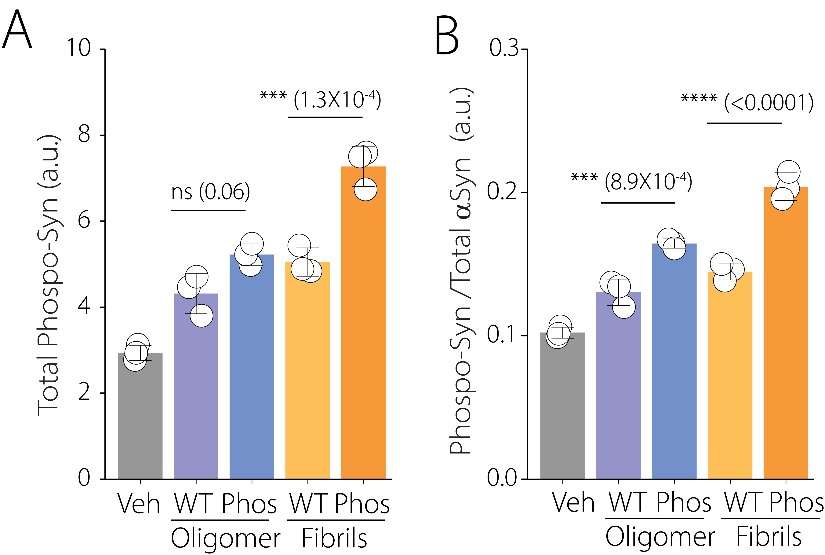


**Figure S6** Quantification of phosphorylated αSyn(A), and the ratio of phosphorylated αSyn and total αSyn (B) in lysate across cell lines using an MSD assay following different seed treatment.
